# Supplementary material for: Metabolites Associated with Vigor to Frailty Among Community-Dwelling Older Black Men
Source: PubMed Central journal article supplement (PMC6572139; doi:10.3390/metabo9050083), 2019-04-30
Supplement: metabolites-09-00083-s001.pdf [file metabolites-09-00083-s001.pdf]

## Metabolites associated with vigor to frailty among community-dwelling older black men Supplemental Information

Table S1. Correlation coefficients of SAVE scores and 334 metabolites among N=287 Health ABC black men, adjusting for age and study site

| Log-transformed and standardized Metabolites | Metabolite profiling method* | Human Metabolome Database ID | Human Metabolome Database Taxonomy sub class | Continuous SAVE scores      |         |                      |
|----------------------------------------------|------------------------------|------------------------------|----------------------------------------------|-----------------------------|---------|----------------------|
|                                              |                              |                              |                                              | Partial Pearson correlation | p-value | False discovery rate |
| Glucuronate                                  | HILIC-neg                    | HMDB00127                    | Carbohydrates and carbohydrate conjugates    | 0.21149                     | 0.0003  | 0.0818               |
| Tryptophan                                   | HILIC-pos                    | HMDB00929                    | Indolyl carboxylic acids and derivatives     | -0.2052                     | 0.0005  | 0.0818               |
| Methionine                                   | HILIC-pos                    | HMDB00696                    | Amino acids, peptides, and analogues         | -0.18887                    | 0.0014  | 0.1512               |
| N-carbamoyl-beta-alanine                     | HILIC-pos                    | HMDB00026                    | Ureas                                        | 0.17218                     | 0.0035  | 0.2195               |
| Tyrosine                                     | HILIC-pos                    | HMDB00158                    | Amino acids, peptides, and analogues         | -0.17156                    | 0.0037  | 0.2195               |
| Isocitrate                                   | HILIC-neg                    | HMDB00193                    | Tricarboxylic acids and derivatives          | 0.17026                     | 0.0039  | 0.2195               |
| Creatinine                                   | HILIC-pos                    | HMDB00562                    | Amino acids, peptides, and analogues         | 0.15638                     | 0.0082  | 0.2749               |
| C4-OH carnitine                              | HILIC-pos                    | HMDB13127                    | Beta hydroxy acids and derivatives           | 0.15503                     | 0.0088  | 0.2749               |
| C14:0 SM                                     | C8-pos                       | HMDB12097                    | Phosphosphingolipids                         | -0.1546                     | 0.0089  | 0.2749               |
| Cystathionine                                | HILIC-neg                    | HMDB00099                    | Amino acids, peptides, and analogues         | 0.15438                     | 0.0090  | 0.2749               |
| Hydroxyphenylacetate                         | HILIC-neg                    | HMDB00020                    | 1-hydroxy-2-unsubstituted benzenoids         | 0.15257                     | 0.0099  | 0.2749               |
| Putrescine                                   | HILIC-pos                    | HMDB01414                    | Amines                                       | 0.15058                     | 0.0109  | 0.2749               |
| 1-methylnicotinamide                         | HILIC-pos                    | HMDB00699                    | Pyridinecarboxylic acids and derivatives     | -0.15012                    | 0.0112  | 0.2749               |
| Asparagine                                   | HILIC-pos                    | HMDB00168                    | Amino acids, peptides, and analogues         | -0.14947                    | 0.0115  | 0.2749               |
| Leucine                                      | HILIC-pos                    | HMDB00687                    | Amino acids, peptides, and analogues         | -0.14326                    | 0.0155  | 0.3452               |
| 5-aminolevulinic acid                        | HILIC-pos                    | HMDB01149                    | Amino acids, peptides, and analogues         | 0.14092                     | 0.0173  | 0.3609               |
| Inosine                                      | HILIC-neg                    | HMDB00195                    | -----                                        | 0.13682                     | 0.0209  | 0.3856               |
| Histidine                                    | HILIC-pos                    | HMDB00177                    | Amino acids, peptides, and analogues         | -0.13248                    | 0.0253  | 0.3856               |
| C34:3 PE plasmalogen                         | C8-pos                       | HMDB11343                    | Glycerophosphoethanolamines                  | -0.13177                    | 0.0261  | 0.3856               |
| Symmetric dimethylarginine (SDMA)            | HILIC-pos                    | HMDB03334                    | Amino acids, peptides, and analogues         | 0.13115                     | 0.0268  | 0.3856               |
| C24:1 ceramide (d18:1)                       | C8-pos                       | HMDB04953                    | Ceramides                                    | 0.1306                      | 0.0275  | 0.3856               |
| C36:4 PE                                     | C8-pos                       | HMDB08937                    | Glycerophosphoethanolamines                  | 0.13007                     | 0.0281  | 0.3856               |
| Urate                                        | HILIC-neg                    | HMDB00289                    | Purines and purine derivatives               | 0.12993                     | 0.0283  | 0.3856               |
| C18:2 CE                                     | C8-pos                       | HMDB00610                    | Steroid esters                               | -0.1296                     | 0.0287  | 0.3856               |
| Trimethylamine-N-oxide                       | HILIC-pos                    | HMDB00925                    | Aminoxides                                   | 0.12779                     | 0.0310  | 0.3856               |
| 2-hydroxyglutarate                           | HILIC-neg                    | HMDB00694                    | Short-chain hydroxy acids and derivatives    | 0.12701                     | 0.0321  | 0.3856               |
| C24:0 SM                                     | C8-pos                       | HMDB11697                    | Phosphosphingolipids                         | -0.12688                    | 0.0323  | 0.3856               |
| Fumarate                                     | HILIC-neg                    | HMDB00134                    | Dicarboxylic acids and derivatives           | 0.12683                     | 0.0323  | 0.3856               |
| C22:0 SM                                     | C8-pos                       | HMDB12103                    | Phosphosphingolipids                         | -0.12543                    | 0.0343  | 0.3906               |
| C20:5 LPC                                    | C8-pos                       | HMDB10397                    | Glycerophosphocholines                       | -0.12489                    | 0.0351  | 0.3906               |
| Salicylurate                                 | HILIC-neg                    | HMDB00840                    | Benzoic acids and derivatives                | 0.12302                     | 0.0379  | 0.4088               |
| Homogentisate                                | HILIC-neg                    | HMDB00130                    | Phenylacetic acids                           | 0.12222                     | 0.0392  | 0.4093               |
| Glycodeoxycholate                            | HILIC-neg                    | HMDB00631                    | Bile acids, alcohols and derivatives         | -0.12091                    | 0.0414  | 0.4187               |
| Malate                                       | HILIC-neg                    | HMDB00156                    | Beta hydroxy acids and derivatives           | 0.11935                     | 0.0441  | 0.4224               |
| 5-hydroxytryptophan                          | HILIC-pos                    | HMDB00472                    | Tryptamines and derivatives                  | -0.11925                    | 0.0443  | 0.4224               |
| C54:10 TAG                                   | C8-pos                       | -----                        | Triradylglycerols                            | -0.1183                     | 0.0460  | 0.4268               |
| C44:13 PE plasmalogen                        | C8-pos                       | -----                        | Glycerophosphoethanolamines                  | -0.11676                    | 0.0489  | 0.4404               |
| C18:2 LPC                                    | C8-pos                       | HMDB10386                    | Glycerophosphocholines                       | -0.11582                    | 0.0508  | 0.4404               |
| C6 carnitine                                 | HILIC-pos                    | HMDB00705                    | Fatty acid esters                            | 0.1155                      | 0.0514  | 0.4404               |
| Uracil                                       | HILIC-neg                    | HMDB00300                    | Pyrimidines and pyrimidine derivatives       | 0.11449                     | 0.0535  | 0.4432               |
| C9 carnitine                                 | HILIC-pos                    | HMDB13288                    | Beta hydroxy acids and derivatives           | -0.11394                    | 0.0547  | 0.4432               |
| Oxalate                                      | HILIC-neg                    | HMDB02329                    | Dicarboxylic acids and derivatives           | 0.11346                     | 0.0557  | 0.4432               |
| C36:1 PS plasmalogen                         | C8-pos                       | -----                        | -----                                        | 0.11138                     | 0.0604  | 0.4691               |
| Kynurenic acid                               | HILIC-pos                    | HMDB00715                    | Quinoline carboxylic acids                   | 0.10953                     | 0.0648  | 0.4921               |
| C36:4 PC-A                                   | C8-pos                       | HMDB07983                    | Glycerophosphocholines                       | -0.10665                    | 0.0722  | 0.5101               |
| Aconitate                                    | HILIC-neg                    | HMDB00072                    | Tricarboxylic acids and derivatives          | 0.10572                     | 0.0748  | 0.5101               |
| Indoxylsulfate                               | HILIC-neg                    | HMDB00682                    | Arylsulfates                                 | 0.10511                     | 0.0765  | 0.5101               |
| C38:2 PE                                     | C8-pos                       | HMDB08942                    | Glycerophosphoethanolamines                  | -0.10482                    | 0.0773  | 0.5101               |
| C34:0 PE                                     | C8-pos                       | HMDB08925                    | Glycerophosphoethanolamines                  | -0.10461                    | 0.0779  | 0.5101               |
| Quinolate                                    | HILIC-neg                    | HMDB00232                    | Pyridinecarboxylic acids and derivatives     | 0.10423                     | 0.0790  | 0.5101               |
| C36:2 PS plasmalogen                         | C8-pos                       | -----                        | -----                                        | 0.10367                     | 0.0806  | 0.5101               |
| C14:0 LPC                                    | C8-pos                       | HMDB10379                    | Glycerophosphocholines                       | -0.10343                    | 0.0813  | 0.5101               |
| Fructose                                     | HILIC-neg                    | HMDB00122                    | Carbohydrates and carbohydrate conjugates    | 0.10344                     | 0.0813  | 0.5101               |
| Lactose                                      | HILIC-neg                    | HMDB00186                    | Carbohydrates and carbohydrate conjugates    | 0.10298                     | 0.0826  | 0.5101               |
| Lysine                                       | HILIC-pos                    | HMDB00182                    | Amino acids, peptides, and analogues         | -0.10253                    | 0.0840  | 0.5101               |

| Log-transformed and standardized Metabolites | Metabolite profiling method* | Human Metabolome Database ID | Human Metabolome Database Taxonomy sub class | Continuous SAVE scores      |         |                      |
|----------------------------------------------|------------------------------|------------------------------|----------------------------------------------|-----------------------------|---------|----------------------|
|                                              |                              |                              |                                              | Partial Pearson correlation | p-value | False discovery rate |
| C26 carnitine                                | HILIC-pos                    | HMDB06347                    | Fatty acid esters                            | -0.10164                    | 0.0868  | 0.5174               |
| C20:0 SM                                     | C8-pos                       | HMDB12102                    | Phosphosphingolipids                         | -0.0996                     | 0.0933  | 0.5446               |
| Isoleucine                                   | HILIC-pos                    | HMDB00172                    | Amino acids, peptides, and analogues         | -0.09899                    | 0.0953  | 0.5446               |
| Uridine                                      | HILIC-neg                    | HMDB00296                    | -----                                        | -0.09873                    | 0.0962  | 0.5446               |
| C34:2 PC                                     | C8-pos                       | HMDB07973                    | Glycerophosphocholines                       | -0.09781                    | 0.0994  | 0.5480               |
| C22:6 LPC                                    | C8-pos                       | HMDB10404                    | Glycerophosphocholines                       | -0.0976                     | 0.1001  | 0.5480               |
| Methylmalonate                               | HILIC-neg                    | HMDB00202                    | Dicarboxylic acids and derivatives           | 0.09657                     | 0.1037  | 0.5588               |
| Methionine sulfoxide                         | HILIC-pos                    | HMDB02005                    | Amino acids, peptides, and analogues         | -0.09552                    | 0.1076  | 0.5636               |
| N-Monomethyl-arginine (NMMA)                 | HILIC-pos                    | HMDB29416                    | Amino acids, peptides, and analogues         | -0.09507                    | 0.1093  | 0.5636               |
| Pyroglutamic acid                            | HILIC-pos                    | HMDB00267                    | Amino acids, peptides, and analogues         | -0.09496                    | 0.1097  | 0.5636               |
| C38:3 PE plasmalogen                         | C8-pos                       | HMDB11384                    | Glycerophosphoethanolamines                  | -0.09209                    | 0.1209  | 0.5917               |
| C36:2 PC                                     | C8-pos                       | HMDB08039                    | Glycerophosphocholines                       | -0.09193                    | 0.1215  | 0.5917               |
| C22:1 SM                                     | C8-pos                       | HMDB12104                    | Phosphosphingolipids                         | -0.09185                    | 0.1218  | 0.5917               |
| C24:0 ceramide (d18:1)                       | C8-pos                       | HMDB04956                    | Ceramides                                    | -0.09176                    | 0.1222  | 0.5917               |
| C38:4 PE                                     | C8-pos                       | HMDB09003                    | Glycerophosphoethanolamines                  | 0.0903                      | 0.1283  | 0.6012               |
| Glycocholate                                 | HILIC-neg                    | HMDB00138                    | Bile acids, alcohols and derivatives         | -0.09026                    | 0.1285  | 0.6012               |
| C38:7 PE plasmalogen                         | C8-pos                       | HMDB11420                    | Glycerophosphoethanolamines                  | -0.09                       | 0.1296  | 0.6012               |
| C40:7 PE plasmalogen                         | C8-pos                       | HMDB11394                    | Glycerophosphoethanolamines                  | -0.08898                    | 0.1340  | 0.6130               |
| Beta-hydroxybutyrate                         | HILIC-neg                    | HMDB00011                    | Beta hydroxy acids and derivatives           | 0.08789                     | 0.1389  | 0.6184               |
| Glutamine                                    | HILIC-pos                    | HMDB00641                    | Amino acids, peptides, and analogues         | -0.0874                     | 0.1411  | 0.6184               |
| Sarcosine                                    | HILIC-pos                    | HMDB00271                    | Amino acids, peptides, and analogues         | -0.08683                    | 0.1437  | 0.6184               |
| Thyroxine                                    | HILIC-pos                    | HMDB00248                    | Amino acids, peptides, and analogues         | -0.08651                    | 0.1452  | 0.6184               |
| C34:1 PC plasmalogen-A                       | C8-pos                       | HMDB11208                    | Glycerophosphocholines                       | 0.08626                     | 0.1463  | 0.6184               |
| Mevalonic acid                               | HILIC-pos                    | HMDB00227                    | Fatty acids and conjugates                   | -0.08611                    | 0.147   | 0.6184               |
| C18:0 LPC                                    | C8-pos                       | HMDB10384                    | Glycerophosphocholines                       | -0.08567                    | 0.1491  | 0.6184               |
| C4 carnitine                                 | HILIC-pos                    | HMDB02013                    | Fatty acid esters                            | 0.0855                      | 0.1500  | 0.6184               |
| C36:4 PE plasmalogen                         | C8-pos                       | HMDB11442                    | Glycerophosphoethanolamines                  | -0.08436                    | 0.1555  | 0.6263               |
| C16:0 ceramide (d18:1)                       | C8-pos                       | HMDB04949                    | Ceramides                                    | 0.08433                     | 0.1556  | 0.6263               |
| Pyruvate                                     | HILIC-neg                    | HMDB00243                    | Alpha-keto acids and derivatives             | 0.08354                     | 0.1596  | 0.6345               |
| C34:0 PI                                     | C8-pos                       | HMDB09805                    | Glycerophosphoinositols                      | -0.0828                     | 0.1633  | 0.6417               |
| Alpha-glycerophosphate                       | HILIC-neg                    | HMDB00126                    | Glycerophosphates                            | -0.0819                     | 0.1679  | 0.6522               |
| Adenosine diphosphate (ADP)                  | HILIC-neg                    | HMDB01341                    | Purine ribonucleotides                       | 0.08085                     | 0.1735  | 0.6649               |
| Carnitine                                    | HILIC-pos                    | HMDB00062                    | Quaternary ammonium salts                    | -0.08053                    | 0.1752  | 0.6649               |
| Gentisate                                    | HILIC-neg                    | HMDB00152                    | Benzoic acids and derivatives                | 0.08015                     | 0.1772  | 0.6651               |
| Phosphocreatine                              | HILIC-neg                    | HMDB01511                    | Amino acids, peptides, and analogues         | -0.07826                    | 0.1877  | 0.6933               |
| C20:5 CE                                     | C8-pos                       | HMDB06731                    | Steroid esters                               | -0.07805                    | 0.1889  | 0.6933               |
| Cotinine                                     | HILIC-pos                    | HMDB01046                    | Pyrrolidinylopyridines                       | 0.07736                     | 0.1928  | 0.7001               |
| C34:2 PE                                     | C8-pos                       | HMDB08928                    | Glycerophosphoethanolamines                  | 0.07618                     | 0.1998  | 0.7143               |
| hexose monophosphate                         | HILIC-neg                    | HMDB00124                    | Carbohydrates and carbohydrate conjugates    | 0.07577                     | 0.2022  | 0.7143               |
| phenylalanine                                | HILIC-pos                    | HMDB00159                    | Amino acids, peptides, and analogues         | -0.0756                     | 0.2032  | 0.7143               |
| C32:2 PC                                     | C8-pos                       | HMDB07874                    | Glycerophosphocholines                       | -0.07488                    | 0.2075  | 0.722                |
| C38:4 DAG                                    | C8-pos                       | HMDB07170                    | Diradylglycerols                             | 0.07357                     | 0.2157  | 0.7222               |
| sucrose                                      | HILIC-neg                    | HMDB00258                    | Carbohydrates and carbohydrate conjugates    | 0.07344                     | 0.2164  | 0.7222               |
| C32:1 PI                                     | C8-pos                       | HMDB09779                    | Glycerophosphoinositols                      | 0.07332                     | 0.2172  | 0.7222               |
| C18:1 carnitine                              | HILIC-pos                    | HMDB05065                    | Fatty acid esters                            | 0.07327                     | 0.2175  | 0.7222               |
| C34:2 PI                                     | C8-pos                       | HMDB09784                    | Glycerophosphoinositols                      | -0.07279                    | 0.2205  | 0.7222               |
| C36:0 PE                                     | C8-pos                       | HMDB08991                    | Glycerophosphoethanolamines                  | -0.07249                    | 0.2225  | 0.7222               |
| C56:4 TAG                                    | C8-pos                       | HMDB05398                    | Triradylglycerols                            | 0.07245                     | 0.2227  | 0.7222               |
| C36:4 PC plasmalogen                         | C8-pos                       | HMDB11310                    | Glycerophosphocholines                       | 0.07077                     | 0.2337  | 0.7266               |
| xanthosine                                   | HILIC-pos                    | HMDB00299                    | Pyrimidine nucleotide sugars                 | -0.07068                    | 0.2343  | 0.7266               |
| C38:5 PE                                     | C8-pos                       | HMDB09069                    | Glycerophosphoethanolamines                  | 0.07015                     | 0.2378  | 0.7266               |
| arginine                                     | HILIC-pos                    | HMDB00517                    | Amino acids, peptides, and analogues         | -0.06993                    | 0.2393  | 0.7266               |
| C20:3 CE                                     | C8-pos                       | HMDB06736                    | Steroid esters                               | -0.06966                    | 0.2411  | 0.7266               |
| C34:4 PC                                     | C8-pos                       | HMDB07883                    | Glycerophosphocholines                       | -0.06963                    | 0.2413  | 0.7266               |
| betaine                                      | HILIC-pos                    | HMDB00043                    | Amino acids, peptides, and analogues         | -0.0693                     | 0.2435  | 0.7266               |
| acetylcholine                                | HILIC-pos                    | HMDB00895                    | Quaternary ammonium salts                    | 0.06929                     | 0.2436  | 0.7266               |
| niacinamide                                  | HILIC-pos                    | HMDB01406                    | Pyridinecarboxylic acids and derivatives     | -0.06928                    | 0.2437  | 0.7266               |
| C36:3 PE plasmalogen                         | C8-pos                       | HMDB11441                    | Glycerophosphoethanolamines                  | -0.0688                     | 0.2470  | 0.7300               |
| beta-alanine                                 | HILIC-pos                    | HMDB00056                    | Amino acids, peptides, and analogues         | -0.06703                    | 0.2594  | 0.7599               |
| Adenosine monophosphate (AMP)                | HILIC-neg                    | HMDB00045                    | Purine ribonucleotides                       | 0.0663                      | 0.2646  | 0.7678               |
| C38:7 PC plasmalogen                         | C8-pos                       | HMDB11229                    | Glycerophosphocholines                       | -0.06579                    | 0.2683  | 0.7678               |

| Log-transformed and standardized Metabolites | Metabolite profiling method* | Human Metabolome Database ID | Human Metabolome Database Taxonomy sub class | Continuous SAVE scores      |         |                      |
|----------------------------------------------|------------------------------|------------------------------|----------------------------------------------|-----------------------------|---------|----------------------|
|                                              |                              |                              |                                              | Partial Pearson correlation | p-value | False discovery rate |
| 4-hydroxymandelate                           | HILIC-neg                    | HMDB00822                    | 1-hydroxy-2-unsubstituted benzenoids         | 0.06564                     | 0.2694  | 0.7678               |
| C40:6 PE                                     | C8-pos                       | HMDB09012                    | Glycerophosphoethanolamines                  | 0.06525                     | 0.2723  | 0.7678               |
| cytosine                                     | HILIC-pos                    | HMDB00630                    | Pyrimidines and pyrimidine derivatives       | 0.06507                     | 0.2736  | 0.7678               |
| C34:2 PC plasmalogen                         | C8-pos                       | HMDB11210                    | Glycerophosphocholines                       | 0.06373                     | 0.2836  | 0.7850               |
| Guanosine monophosphate (GMP)                | HILIC-neg                    | HMDB01397                    | Eicosanoids                                  | 0.06358                     | 0.2848  | 0.7850               |
| C36:1 PE                                     | C8-pos                       | HMDB08993                    | Glycerophosphoethanolamines                  | 0.06332                     | 0.2867  | 0.7850               |
| C34:3 PC plasmalogen                         | C8-pos                       | HMDB11211                    | Glycerophosphocholines                       | -0.06241                    | 0.2937  | 0.7967               |
| C34:2 PE plasmalogen                         | C8-pos                       | HMDB08952                    | Glycerophosphoethanolamines                  | -0.06193                    | 0.2975  | 0.7967               |
| C42:11 PE plasmalogen                        | C8-pos                       | -----                        | Glycerophosphoethanolamines                  | -0.06184                    | 0.2982  | 0.7967               |
| C2 carnitine                                 | HILIC-pos                    | HMDB00201                    | Fatty acid esters                            | 0.06131                     | 0.3024  | 0.8015               |
| C36:5 PC plasmalogen-A                       | C8-pos                       | HMDB11221                    | Glycerophosphocholines                       | -0.0607                     | 0.3072  | 0.8079               |
| C38:5 DAG                                    | C8-pos                       | HMDB07199                    | Diradylglycerols                             | 0.06012                     | 0.3119  | 0.8138               |
| pantothenate                                 | HILIC-neg                    | HMDB00210                    | Alcohols and polyols                         | -0.05962                    | 0.3159  | 0.8173               |
| C38:6 PC                                     | C8-pos                       | HMDB07991                    | Glycerophosphocholines                       | -0.05935                    | 0.3181  | 0.8173               |
| C56:1 TAG                                    | C8-pos                       | HMDB05396                    | Triradylglycerols                            | -0.05848                    | 0.3252  | 0.8199               |
| C22:5 CE                                     | C8-pos                       | HMDB10375                    | Steroid esters                               | -0.05792                    | 0.3299  | 0.8199               |
| C30:0 PC                                     | C8-pos                       | HMDB07869                    | Glycerophosphocholines                       | -0.05789                    | 0.3301  | 0.8199               |
| C16:0 LPC                                    | C8-pos                       | HMDB10382                    | Glycerophosphocholines                       | -0.05785                    | 0.3305  | 0.8199               |
| C18 carnitine                                | HILIC-pos                    | HMDB00848                    | Fatty acid esters                            | -0.05746                    | 0.3337  | 0.8199               |
| C22:0 ceramide (d18:1)                       | C8-pos                       | HMDB04952                    | Ceramides                                    | -0.05735                    | 0.3347  | 0.8199               |
| C20:3 LPC                                    | C8-pos                       | HMDB10393                    | Glycerophosphocholines                       | -0.05619                    | 0.3446  | 0.8199               |
| C52:0 TAG                                    | C8-pos                       | HMDB05365                    | Triradylglycerols                            | -0.05615                    | 0.3449  | 0.8199               |
| C52:2 TAG                                    | C8-pos                       | HMDB05369                    | Triradylglycerols                            | 0.05612                     | 0.3452  | 0.8199               |
| C54:1 TAG                                    | C8-pos                       | HMDB05395                    | Triradylglycerols                            | -0.05607                    | 0.3456  | 0.8199               |
| C36:2 DAG                                    | C8-pos                       | HMDB07218                    | Diradylglycerols                             | 0.05601                     | 0.3461  | 0.8199               |
| C50:2 TAG                                    | C8-pos                       | HMDB05377                    | Triradylglycerols                            | 0.0554                      | 0.3514  | 0.8200               |
| C40:9 PC                                     | C8-pos                       | HMDB08731                    | Glycerophosphocholines                       | -0.05516                    | 0.3535  | 0.8200               |
| Malondialdehyde (MDA)                        | HILIC-neg                    | HMDB06112                    | Carbonyl compounds                           | -0.05493                    | 0.3555  | 0.8200               |
| histamine                                    | HILIC-pos                    | HMDB00870                    | Amines                                       | 0.0546                      | 0.3584  | 0.8200               |
| C3-DC-CH3 carnitine                          | HILIC-pos                    | HMDB13133                    | Beta hydroxy acids and derivatives           | 0.05448                     | 0.3595  | 0.8200               |
| C18:2 LPE                                    | C8-pos                       | HMDB11507                    | Glycerophosphoethanolamines                  | -0.05411                    | 0.3628  | 0.8200               |
| C36:2 PE plasmalogen                         | C8-pos                       | HMDB09082                    | Glycerophosphoethanolamines                  | -0.05404                    | 0.3634  | 0.8200               |
| C22:6 CE                                     | C8-pos                       | HMDB06733                    | Steroid esters                               | -0.05318                    | 0.3710  | 0.8236               |
| hypoxanthine                                 | HILIC-neg                    | HMDB00157                    | Purines and purine derivatives               | 0.05311                     | 0.3717  | 0.8236               |
| C36:5 PC plasmalogen-B                       | C8-pos                       | HMDB11220                    | Glycerophosphocholines                       | 0.05304                     | 0.3724  | 0.8236               |
| citrate                                      | HILIC-neg                    | HMDB00094                    | Tricarboxylic acids and derivatives          | 0.05265                     | 0.3758  | 0.8259               |
| C46:0 TAG                                    | C8-pos                       | HMDB10411                    | Triradylglycerols                            | -0.05212                    | 0.3807  | 0.8267               |
| C20:4 LPC                                    | C8-pos                       | HMDB10395                    | Glycerophosphocholines                       | -0.05207                    | 0.3812  | 0.8267               |
| C56:6 TAG                                    | C8-pos                       | HMDB05456                    | Triradylglycerols                            | 0.05142                     | 0.3871  | 0.8342               |
| C38:6 PE                                     | C8-pos                       | HMDB09102                    | Glycerophosphoethanolamines                  | 0.05076                     | 0.3933  | 0.8390               |
| C54:6 TAG                                    | C8-pos                       | HMDB05391                    | Triradylglycerols                            | 0.05064                     | 0.3944  | 0.8390               |
| C34:1 PC                                     | C8-pos                       | HMDB07972                    | Glycerophosphocholines                       | 0.05032                     | 0.3974  | 0.8400               |
| valine                                       | HILIC-pos                    | HMDB00883                    | Amino acids, peptides, and analogues         | -0.04926                    | 0.4074  | 0.8559               |
| Guanosine diphosphate (GDP)                  | HILIC-neg                    | HMDB01201                    | Purine ribonucleotides                       | 0.04866                     | 0.4131  | 0.8617               |
| inositol                                     | HILIC-neg                    | HMDB00211                    | Alcohols and polyols                         | 0.04843                     | 0.4154  | 0.8617               |
| C16 carnitine                                | HILIC-pos                    | HMDB00222                    | Fatty acid esters                            | 0.04783                     | 0.4212  | 0.8653               |
| C32:1 PC                                     | C8-pos                       | HMDB07873                    | Glycerophosphocholines                       | 0.04764                     | 0.4231  | 0.8653               |
| C8 carnitine                                 | HILIC-pos                    | HMDB00791                    | Fatty acid esters                            | 0.04722                     | 0.4272  | 0.8653               |
| 2-phosphoglycerate                           | HILIC-neg                    | HMDB00807                    | Carbohydrates and carbohydrate conjugates    | -0.04719                    | 0.4275  | 0.8653               |
| C34:2 DAG                                    | C8-pos                       | HMDB07103                    | Lineolic acids and derivatives               | 0.04651                     | 0.4341  | 0.8734               |
| C30:0 DAG                                    | C8-pos                       | HMDB07011                    | Diradylglycerols                             | -0.04482                    | 0.4510  | 0.9020               |
| C16:0 CE                                     | C8-pos                       | HMDB00885                    | Steroid esters                               | -0.04452                    | 0.4540  | 0.9027               |
| alpha-hydroxybutyrate                        | HILIC-neg                    | HMDB00008                    | Alpha hydroxy acids and derivatives          | 0.04343                     | 0.4652  | 0.9049               |
| succinate                                    | HILIC-neg                    | HMDB00254                    | Dicarboxylic acids and derivatives           | 0.04319                     | 0.4676  | 0.9049               |
| C10 carnitine                                | HILIC-pos                    | HMDB00651                    | Fatty acid esters                            | 0.04302                     | 0.4695  | 0.9049               |
| sorbitol                                     | HILIC-neg                    | HMDB00247                    | Carbohydrates and carbohydrate conjugates    | 0.04231                     | 0.4768  | 0.9049               |
| C52:3 TAG                                    | C8-pos                       | HMDB05384                    | Triradylglycerols                            | 0.04212                     | 0.4788  | 0.9049               |
| threonine                                    | HILIC-pos                    | HMDB00167                    | Amino acids, peptides, and analogues         | 0.04184                     | 0.4817  | 0.9049               |
| C54:4 TAG                                    | C8-pos                       | HMDB05370                    | Triradylglycerols                            | 0.04148                     | 0.4855  | 0.9049               |
| C40:10 PC                                    | C8-pos                       | HMDB08511                    | Glycerophosphocholines                       | -0.04123                    | 0.4882  | 0.9049               |
| taurine                                      | HILIC-pos                    | HMDB00251                    | Organosulfonic acids and derivatives         | 0.04119                     | 0.4886  | 0.9049               |

| Log-transformed and standardized Metabolites | Metabolite profiling method* | Human Metabolome Database ID | Human Metabolome Database Taxonomy sub class | Continuous SAVE scores      |         |                      |
|----------------------------------------------|------------------------------|------------------------------|----------------------------------------------|-----------------------------|---------|----------------------|
|                                              |                              |                              |                                              | Partial Pearson correlation | p-value | False discovery rate |
| choline                                      | HILIC-pos                    | HMDB00097                    | Quaternary ammonium salts                    | -0.04083                    | 0.4924  | 0.9049               |
| Uridine diphosphate (UDP)-glucose            | HILIC-neg                    | HMDB00286                    | Pyrimidine nucleotide sugars                 | 0.04035                     | 0.4975  | 0.9049               |
| C56:3 TAG                                    | C8-pos                       | HMDB05410                    | Triradylglycerols                            | 0.04015                     | 0.4996  | 0.9049               |
| proline                                      | HILIC-pos                    | HMDB00162                    | Amino acids, peptides, and analogues         | 0.04007                     | 0.5005  | 0.9049               |
| 2-aminoadipate                               | HILIC-neg                    | HMDB00510                    | Amino acids, peptides, and analogues         | 0.03963                     | 0.5052  | 0.9049               |
| 3-hydroxyanthranilic acid                    | HILIC-pos                    | HMDB01476                    | Benzoic acids and derivatives                | -0.03955                    | 0.5061  | 0.9049               |
| C36:2 PE                                     | C8-pos                       | HMDB08994                    | Glycerophosphoethanolamines                  | 0.03952                     | 0.5064  | 0.9049               |
| C16-OH carnitine                             | HILIC-pos                    | HMDB13337                    | Beta hydroxy acids and derivatives           | -0.03906                    | 0.5113  | 0.9049               |
| C36:0 PC                                     | C8-pos                       | HMDB08036                    | Glycerophosphocholines                       | -0.03904                    | 0.5115  | 0.9049               |
| C5-DC carnitine                              | HILIC-pos                    | HMDB13130                    | Beta hydroxy acids and derivatives           | 0.03896                     | 0.5124  | 0.9049               |
| C24:1 SM                                     | C8-pos                       | HMDB12107                    | Phosphosphingolipids                         | 0.0388                      | 0.5141  | 0.9049               |
| allantoin                                    | HILIC-pos                    | HMDB00462                    | Imidazoles                                   | 0.03864                     | 0.5159  | 0.9049               |
| C54:3 TAG                                    | C8-pos                       | HMDB05405                    | Triradylglycerols                            | 0.03821                     | 0.5205  | 0.9049               |
| C48:5 TAG                                    | C8-pos                       | -----                        | Triradylglycerols                            | -0.03803                    | 0.5226  | 0.9049               |
| C56:5 TAG                                    | C8-pos                       | HMDB05406                    | Triradylglycerols                            | 0.038                       | 0.5228  | 0.9049               |
| C34:0 DAG                                    | C8-pos                       | HMDB07100                    | Diradylglycerols                             | -0.038                      | 0.5229  | 0.9049               |
| phosphoethanolamine                          | HILIC-pos                    | HMDB00224                    | Phosphate esters                             | 0.03739                     | 0.5296  | 0.9118               |
| C34:0 PS                                     | C8-pos                       | HMDB12356                    | Glycerophosphoserines                        | -0.03705                    | 0.5333  | 0.9135               |
| citrulline                                   | HILIC-pos                    | HMDB00904                    | Amino acids, peptides, and analogues         | 0.03573                     | 0.5480  | 0.9273               |
| C22:6 LPE                                    | C8-pos                       | HMDB11526                    | Glycerophosphoethanolamines                  | -0.03533                    | 0.5525  | 0.9273               |
| C20:4 LPE                                    | C8-pos                       | HMDB11517                    | Glycerophosphoethanolamines                  | 0.03524                     | 0.5535  | 0.9273               |
| hydroxyproline                               | HILIC-pos                    | HMDB00725                    | Amino acids, peptides, and analogues         | 0.03512                     | 0.5549  | 0.9273               |
| C44:0 TAG                                    | C8-pos                       | HMDB42063                    | Triradylglycerols                            | -0.03508                    | 0.5553  | 0.9273               |
| C42:0 TAG                                    | C8-pos                       | -----                        | Triradylglycerols                            | -0.03473                    | 0.5592  | 0.9293               |
| alpha-glycerophosphocholine                  | HILIC-pos                    | HMDB00086                    | Glycerophosphocholines                       | -0.03444                    | 0.5625  | 0.9294               |
| C38:6 PE plasmalogen                         | C8-pos                       | HMDB11387                    | Glycerophosphoethanolamines                  | -0.03415                    | 0.5659  | 0.9294               |
| C38:2 PC                                     | C8-pos                       | HMDB08270                    | Glycerophosphocholines                       | -0.03372                    | 0.5707  | 0.9294               |
| C34:3 DAG                                    | C8-pos                       | HMDB07132                    | Lineolic acids and derivatives               | 0.03342                     | 0.5743  | 0.9294               |
| C36:3 PE                                     | C8-pos                       | HMDB09060                    | Glycerophosphoethanolamines                  | 0.0333                      | 0.5756  | 0.9294               |
| chenodeoxycholate/deoxycholate               | HILIC-neg                    | HMDB00626                    | Bile acids, alcohols and derivatives         | 0.03285                     | 0.5808  | 0.9294               |
| hippurate                                    | HILIC-neg                    | HMDB00714                    | Benzoic acids and derivatives                | 0.0327                      | 0.5825  | 0.9294               |
| C16:0 LPE                                    | C8-pos                       | HMDB11503                    | Glycerophosphoethanolamines                  | 0.03255                     | 0.5842  | 0.9294               |
| C44:1 TAG                                    | C8-pos                       | -----                        | Triradylglycerols                            | -0.0322                     | 0.5882  | 0.9294               |
| C56:2 TAG                                    | C8-pos                       | HMDB05404                    | Triradylglycerols                            | -0.03215                    | 0.5888  | 0.9294               |
| C36:3 DAG                                    | C8-pos                       | HMDB07219                    | Lineolic acids and derivatives               | 0.03187                     | 0.5921  | 0.9294               |
| C50:0 TAG                                    | C8-pos                       | HMDB05357                    | Triradylglycerols                            | -0.03178                    | 0.5932  | 0.9294               |
| C32:0 PC                                     | C8-pos                       | HMDB07871                    | Glycerophosphocholines                       | 0.03142                     | 0.5974  | 0.9294               |
| cAMP                                         | HILIC-neg                    | HMDB00058                    | Cyclic purine nucleotides                    | 0.03134                     | 0.5983  | 0.9294               |
| C18:3 CE                                     | C8-pos                       | HMDB10370                    | Steroid esters                               | -0.03035                    | 0.6098  | 0.9423               |
| C50:1 TAG                                    | C8-pos                       | HMDB05360                    | Triradylglycerols                            | 0.02986                     | 0.6156  | 0.9423               |
| C34:0 PC                                     | C8-pos                       | HMDB07970                    | Glycerophosphocholines                       | -0.02931                    | 0.6222  | 0.9423               |
| C46:4 TAG                                    | C8-pos                       | -----                        | Triradylglycerols                            | -0.02924                    | 0.623   | 0.9423               |
| C18:2 carnitine                              | HILIC-pos                    | HMDB06469                    | Fatty acid esters                            | 0.02885                     | 0.6277  | 0.9423               |
| Asymmetric dimethylarginine (ADMA)           | HILIC-pos                    | HMDB01539                    | Amino acids, peptides, and analogues         | -0.02843                    | 0.6326  | 0.9423               |
| alanine                                      | HILIC-pos                    | HMDB00161                    | Amino acids, peptides, and analogues         | 0.0284                      | 0.6330  | 0.9423               |
| ornithine                                    | HILIC-pos                    | HMDB00214                    | Amino acids, peptides, and analogues         | -0.02814                    | 0.6361  | 0.9423               |
| sphingosine                                  | C8-pos                       | HMDB00252                    | Amines                                       | 0.0281                      | 0.6367  | 0.9423               |
| C50:3 TAG                                    | C8-pos                       | HMDB05433                    | Triradylglycerols                            | 0.02793                     | 0.6387  | 0.9423               |
| C18:1 LPC                                    | C8-pos                       | HMDB02815                    | Glycerophosphocholines                       | -0.02744                    | 0.6446  | 0.9423               |
| C38:4 PI                                     | C8-pos                       | HMDB09815                    | Glycerophosphoinositols                      | -0.02734                    | 0.6458  | 0.9423               |
| C16:1 CE                                     | C8-pos                       | HMDB00658                    | Steroid esters                               | 0.02679                     | 0.6525  | 0.9423               |
| Gamma-Aminobutyric acid (GABA)               | HILIC-pos                    | HMDB00112                    | Amino acids, peptides, and analogues         | -0.02651                    | 0.6559  | 0.9423               |
| C44:2 TAG                                    | C8-pos                       | -----                        | Triradylglycerols                            | -0.02633                    | 0.6580  | 0.9423               |
| C48:0 TAG                                    | C8-pos                       | HMDB05356                    | Triradylglycerols                            | -0.02627                    | 0.6588  | 0.9423               |
| C18:0 LPE                                    | C8-pos                       | HMDB11130                    | Glycerophosphoethanolamines                  | 0.02584                     | 0.6640  | 0.9423               |
| Inosinic acid (IMP)                          | HILIC-neg                    | HMDB00175                    | Purine ribonucleotides                       | 0.02572                     | 0.6655  | 0.9423               |
| C18:1 SM                                     | C8-pos                       | HMDB12101                    | Phosphosphingolipids                         | 0.02559                     | 0.6671  | 0.9423               |
| C46:2 TAG                                    | C8-pos                       | HMDB10419                    | Triradylglycerols                            | -0.02539                    | 0.6696  | 0.9423               |
| C18:2 SM                                     | C8-pos                       | -----                        | -----                                        | 0.02494                     | 0.6750  | 0.9423               |

| Log-transformed and standardized Metabolites | Metabolite profiling method* | Human Metabolome Database ID | Human Metabolome Database Taxonomy sub class | Continuous SAVE scores      |         |                      |
|----------------------------------------------|------------------------------|------------------------------|----------------------------------------------|-----------------------------|---------|----------------------|
|                                              |                              |                              |                                              | Partial Pearson correlation | p-value | False discovery rate |
| xanthine                                     | HILIC-neg                    | HMDB00292                    | Purines and purine derivatives               | -0.02486                    | 0.6760  | 0.9423               |
| C46:3 TAG                                    | C8-pos                       | -----                        | Triradylglycerols                            | -0.02467                    | 0.6783  | 0.9423               |
| aminoisobutyric acid                         | HILIC-pos                    | HMDB01906                    | Amino acids, peptides, and analogues         | 0.02437                     | 0.6820  | 0.9423               |
| C14:1 carnitine                              | HILIC-pos                    | HMDB02014                    | Fatty acid esters                            | 0.02386                     | 0.6883  | 0.9423               |
| C22:1 MAG                                    | C8-pos                       | HMDB11582                    | Monoradylglycerols                           | 0.0238                      | 0.6891  | 0.9423               |
| C52:5 TAG                                    | C8-pos                       | HMDB05380                    | Triradylglycerols                            | 0.02357                     | 0.6919  | 0.9423               |
| C36:3 PC                                     | C8-pos                       | HMDB08105                    | Glycerophosphocholines                       | -0.02337                    | 0.6944  | 0.9423               |
| C36:0 DAG                                    | C8-pos                       | HMDB07158                    | Diradylglycerols                             | 0.02315                     | 0.6971  | 0.9423               |
| Creatine                                     | HILIC-pos                    | HMDB00064                    | Amino acids, peptides, and analogues         | 0.02304                     | 0.6985  | 0.9423               |
| C58:7 TAG                                    | C8-pos                       | HMDB05471                    | Triradylglycerols                            | 0.02216                     | 0.7095  | 0.9423               |
| C5 carnitine                                 | HILIC-pos                    | HMDB00688                    | Fatty acid esters                            | -0.02202                    | 0.7112  | 0.9423               |
| C14:1 MAG                                    | C8-pos                       | HMDB11562                    | Monoradylglycerols                           | -0.02182                    | 0.7137  | 0.9423               |
| C18:0 MAG                                    | C8-pos                       | HMDB11131                    | Monoradylglycerols                           | -0.02173                    | 0.7149  | 0.9423               |
| C56:8 TAG                                    | C8-pos                       | HMDB05392                    | Triradylglycerols                            | -0.02114                    | 0.7223  | 0.9423               |
| C18:1-OH carnitine                           | HILIC-pos                    | HMDB13339                    | Beta hydroxy acids and derivatives           | 0.02104                     | 0.7236  | 0.9423               |
| Serine                                       | HILIC-pos                    | HMDB00187                    | Amino acids, peptides, and analogues         | -0.0209                     | 0.7253  | 0.9423               |
| C7 carnitine                                 | HILIC-pos                    | HMDB13238                    | Beta hydroxy acids and derivatives           | 0.02088                     | 0.7256  | 0.9423               |
| C12 carnitine                                | HILIC-pos                    | HMDB02250                    | Fatty acid esters                            | -0.02084                    | 0.7261  | 0.9423               |
| C36:2 PC plasmalogen                         | C8-pos                       | HMDB11243                    | Glycerophosphocholines                       | 0.02063                     | 0.7287  | 0.9423               |
| Lactate                                      | HILIC-neg                    | HMDB00190                    | Alpha hydroxy acids and derivatives          | 0.02005                     | 0.7361  | 0.9423               |
| C18:0 CE                                     | C8-pos                       | HMDB10368                    | Steroid esters                               | -0.01977                    | 0.7396  | 0.9423               |
| C52:7 TAG                                    | C8-pos                       | HMDB10517                    | Triradylglycerols                            | -0.01978                    | 0.7396  | 0.9423               |
| C36:1 PC plasmalogen                         | C8-pos                       | HMDB11241                    | Glycerophosphocholines                       | 0.01909                     | 0.7483  | 0.9423               |
| C46:1 TAG                                    | C8-pos                       | HMDB10412                    | Triradylglycerols                            | -0.01904                    | 0.7489  | 0.9423               |
| C38:5 PE plasmalogen                         | C8-pos                       | HMDB11386                    | Glycerophosphoethanolamines                  | 0.0189                      | 0.7507  | 0.9423               |
| C16:1 SM                                     | C8-pos                       | -----                        | -----                                        | 0.01881                     | 0.7519  | 0.9423               |
| C16:1 MAG                                    | C8-pos                       | HMDB11565                    | Monoradylglycerols                           | 0.01878                     | 0.7522  | 0.9423               |
| C36:5 PE plasmalogen                         | C8-pos                       | HMDB11410                    | Glycerophosphoethanolamines                  | -0.01874                    | 0.7528  | 0.9423               |
| Glutamate                                    | HILIC-pos                    | HMDB00148                    | Amino acids, peptides, and analogues         | 0.01867                     | 0.7537  | 0.9423               |
| C38:4 PC plasmalogen                         | C8-pos                       | HMDB11252                    | Glycerophosphocholines                       | 0.01861                     | 0.7544  | 0.9423               |
| C38:3 PC                                     | C8-pos                       | HMDB08047                    | Glycerophosphocholines                       | -0.01839                    | 0.7572  | 0.9423               |
| C58:11 TAG                                   | C8-pos                       | HMDB10531                    | Triradylglycerols                            | -0.01816                    | 0.7601  | 0.9423               |
| C56:9 TAG                                    | C8-pos                       | HMDB05448                    | Triradylglycerols                            | -0.01813                    | 0.7605  | 0.9423               |
| Uridine 5'-diphosphate (UDP)                 | HILIC-neg                    | HMDB00295                    | Pyrimidine ribonucleotides                   | 0.01804                     | 0.7617  | 0.9423               |
| C40:6 PC                                     | C8-pos                       | HMDB08057                    | Glycerophosphocholines                       | -0.0164                     | 0.7829  | 0.9546               |
| C48:1 TAG                                    | C8-pos                       | HMDB05359                    | Triradylglycerols                            | -0.01625                    | 0.7847  | 0.9546               |
| C34:1 DAG                                    | C8-pos                       | HMDB07102                    | Diradylglycerols                             | 0.01603                     | 0.7875  | 0.9546               |
| C52:4 TAG                                    | C8-pos                       | HMDB05363                    | Triradylglycerols                            | 0.01586                     | 0.7898  | 0.9546               |
| C36:3 PC plasmalogen                         | C8-pos                       | HMDB11244                    | Glycerophosphocholines                       | -0.01563                    | 0.7928  | 0.9546               |
| C54:8 TAG                                    | C8-pos                       | HMDB10518                    | Triradylglycerols                            | -0.0152                     | 0.7984  | 0.9546               |
| Adenosine                                    | HILIC-pos                    | HMDB00050                    | -----                                        | 0.01511                     | 0.7995  | 0.9546               |
| C58:9 TAG                                    | C8-pos                       | HMDB05463                    | Triradylglycerols                            | -0.01443                    | 0.8084  | 0.9546               |
| C38:6 PC plasmalogen                         | C8-pos                       | HMDB11319                    | Glycerophosphocholines                       | 0.01437                     | 0.8092  | 0.9546               |
| 3-methyladipate/pimelate                     | HILIC-neg                    | HMDB00555                    | Fatty acids and conjugates                   | -0.01384                    | 0.8160  | 0.9546               |
| C58:6 TAG                                    | C8-pos                       | HMDB05458                    | Triradylglycerols                            | 0.01384                     | 0.8160  | 0.9546               |
| Acetylglycine                                | HILIC-pos                    | HMDB00532                    | Amino acids, peptides, and analogues         | -0.01368                    | 0.8181  | 0.9546               |
| C16:1 LPC                                    | C8-pos                       | HMDB10383                    | Glycerophosphocholines                       | 0.01341                     | 0.8217  | 0.9546               |
| C20:4 CE                                     | C8-pos                       | HMDB06726                    | Steroid esters                               | -0.01331                    | 0.8230  | 0.9546               |
| Serotonin                                    | HILIC-pos                    | HMDB00259                    | Tryptamines and derivatives                  | 0.01276                     | 0.8301  | 0.9546               |
| C48:4 TAG                                    | C8-pos                       | -----                        | Triradylglycerols                            | -0.01272                    | 0.8307  | 0.9546               |
| 1-methylhistamine                            | HILIC-pos                    | HMDB00898                    | Amines                                       | -0.01246                    | 0.8342  | 0.9546               |
| C32:2 DAG                                    | C8-pos                       | HMDB07128                    | Diradylglycerols                             | 0.01245                     | 0.8342  | 0.9546               |
| Benzoate                                     | HILIC-neg                    | HMDB01870                    | Benzoic acids and derivatives                | 0.01238                     | 0.8351  | 0.9546               |
| C14 carnitine                                | HILIC-pos                    | HMDB05066                    | Fatty acid esters                            | -0.01187                    | 0.8419  | 0.9546               |
| C36:1 DAG                                    | C8-pos                       | HMDB07216                    | Diradylglycerols                             | -0.0116                     | 0.8454  | 0.9546               |
| C54:7 TAG                                    | C8-pos                       | HMDB05447                    | Triradylglycerols                            | 0.0116                      | 0.8455  | 0.9546               |
| C50:6 TAG                                    | C8-pos                       | HMDB10497                    | Triradylglycerols                            | -0.01156                    | 0.8459  | 0.9546               |
| Dimethylglycine                              | HILIC-pos                    | HMDB00092                    | Amino acids, peptides, and analogues         | 0.01154                     | 0.8462  | 0.9546               |
| C48:3 TAG                                    | C8-pos                       | HMDB05432                    | Triradylglycerols                            | -0.01145                    | 0.8474  | 0.9546               |
| C34:3 PC                                     | C8-pos                       | HMDB08006                    | Glycerophosphocholines                       | -0.0114                     | 0.8481  | 0.9546               |
| C16:0 SM                                     | C8-pos                       | HMDB10169                    | Phosphosphingolipids                         | 0.01123                     | 0.8503  | 0.9546               |
| C36:1 PC                                     | C8-pos                       | HMDB08038                    | Glycerophosphocholines                       | 0.01111                     | 0.8518  | 0.9546               |

| Log-transformed and standardized Metabolites | Metabolite profiling method* | Human Metabolome Database ID | Human Metabolome Database Taxonomy sub class | Continuous SAVE scores      |         |                      |
|----------------------------------------------|------------------------------|------------------------------|----------------------------------------------|-----------------------------|---------|----------------------|
|                                              |                              |                              |                                              | Partial Pearson correlation | p-value | False discovery rate |
| C18:0 SM                                     | C8-pos                       | HMDB01348                    | Phosphosphingolipids                         | 0.01091                     | 0.8545  | 0.9546               |
| C54:5 TAG                                    | C8-pos                       | HMDB05385                    | Triradylcglycerols                           | 0.01062                     | 0.8583  | 0.9556               |
| C58:10 TAG                                   | C8-pos                       | HMDB05476                    | Triradylcglycerols                           | -0.01008                    | 0.8655  | 0.9604               |
| C10:2 carnitine                              | HILIC-pos                    | HMDB13325                    | -----                                        | -0.00986                    | 0.8684  | 0.9604               |
| C18:1 CE                                     | C8-pos                       | HMDB00918                    | Steroid esters                               | 0.00958                     | 0.8721  | 0.9606               |
| C50:5 TAG                                    | C8-pos                       | HMDB10471                    | Triradylcglycerols                           | -0.00913                    | 0.8780  | 0.9606               |
| C48:2 TAG                                    | C8-pos                       | HMDB05376                    | Triradylcglycerols                           | -0.00908                    | 0.8787  | 0.9606               |
| C14:2 carnitine                              | HILIC-pos                    | HMDB13331                    | -----                                        | 0.00898                     | 0.8801  | 0.9606               |
| Alpha-ketoglutarate                          | HILIC-neg                    | HMDB00208                    | Gamma-keto acids and derivatives             | 0.0084                      | 0.8877  | 0.9658               |
| C5:1 carnitine                               | HILIC-pos                    | HMDB02366                    | Fatty acid esters                            | -0.0081                     | 0.8917  | 0.9669               |
| Kynurenine                                   | HILIC-neg                    | HMDB00684                    | Carbonyl compounds                           | -0.00789                    | 0.8945  | 0.9669               |
| C36:4 PC-B                                   | C8-pos                       | HMDB08138                    | Glycerophosphocholines                       | -0.00594                    | 0.9205  | 0.9785               |
| C56:10 TAG                                   | C8-pos                       | HMDB10513                    | Triradylcglycerols                           | -0.00581                    | 0.9222  | 0.9785               |
| Xanthurenate                                 | HILIC-neg                    | HMDB00881                    | Quinoline carboxylic acids                   | 0.00576                     | 0.9228  | 0.9785               |
| C56:7 TAG                                    | C8-pos                       | HMDB05462                    | Triradylcglycerols                           | -0.00569                    | 0.9239  | 0.9785               |
| C32:2 PI                                     | C8-pos                       | HMDB09798                    | Glycerophosphoinositols                      | 0.00543                     | 0.9273  | 0.9785               |
| C36:4 DAG                                    | C8-pos                       | HMDB07248                    | Lineolic acids and derivatives               | 0.00494                     | 0.9338  | 0.9785               |
| C18:1 LPE                                    | C8-pos                       | HMDB11506                    | Glycerophosphoethanolamines                  | -0.00465                    | 0.9377  | 0.9785               |
| C40:7 PC plasmalogen                         | C8-pos                       | HMDB11294                    | Glycerophosphocholines                       | 0.00465                     | 0.9377  | 0.9785               |
| C54:2 TAG                                    | C8-pos                       | HMDB05403                    | Triradylcglycerols                           | 0.00433                     | 0.9419  | 0.9785               |
| C52:6 TAG                                    | C8-pos                       | HMDB05436                    | Triradylcglycerols                           | 0.004                       | 0.9464  | 0.9785               |
| C3 carnitine                                 | HILIC-pos                    | HMDB00824                    | Fatty acid esters                            | 0.00388                     | 0.9480  | 0.9785               |
| C38:4 PC                                     | C8-pos                       | HMDB08048                    | Glycerophosphocholines                       | 0.0037                      | 0.9505  | 0.9785               |
| 4-pyridoxate                                 | HILIC-neg                    | HMDB00017                    | Pyridinecarboxylic acids and derivatives     | -0.00368                    | 0.9507  | 0.9785               |
| C30:1 PC                                     | C8-pos                       | HMDB07870                    | Glycerophosphocholines                       | 0.00331                     | 0.9557  | 0.9785               |
| C20:4 carnitine                              | HILIC-pos                    | -----                        | -----                                        | 0.0033                      | 0.9558  | 0.9785               |
| C52:1 TAG                                    | C8-pos                       | HMDB05367                    | Triradylcglycerols                           | -0.00323                    | 0.9567  | 0.9785               |
| Indole-3-propionate                          | HILIC-neg                    | HMDB02302                    | Indolyl carboxylic acids and derivatives     | -0.00313                    | 0.9580  | 0.9785               |
| Adipate                                      | HILIC-neg                    | HMDB00448                    | Fatty acids and conjugates                   | 0.00305                     | 0.9591  | 0.9785               |
| C12:1 carnitine                              | HILIC-pos                    | HMDB13326                    | Beta hydroxy acids and derivatives           | 0.0027                      | 0.9639  | 0.9785               |
| Pipecolic acid                               | HILIC-pos                    | HMDB00716                    | Amino acids, peptides, and analogues         | 0.00256                     | 0.9657  | 0.9785               |
| C50:4 TAG                                    | C8-pos                       | HMDB05435                    | Triradylcglycerols                           | -0.00248                    | 0.9668  | 0.9785               |
| C22:4 CE                                     | C8-pos                       | HMDB06729                    | Steroid esters                               | 0.00177                     | 0.9763  | 0.9852               |
| C32:0 DAG                                    | C8-pos                       | HMDB07098                    | Diradylglycerols                             | 0.00093                     | 0.9875  | 0.9935               |
| C58:8 TAG                                    | C8-pos                       | HMDB05413                    | Triradylcglycerols                           | 0.00068                     | 0.9909  | 0.9939               |
| C32:1 DAG                                    | C8-pos                       | HMDB07099                    | Diradylglycerols                             | -0.00006                    | 0.9992  | 0.9992               |

Grey shaded rows indicate metabolites with false discovery rate <0.30

\*Metabolite profiling methods: Lipid profiling method (C8-pos); Positive ion mode MS detection (HILIC-pos); Negative ion mode MS detection (HILIC-neg)

Note: the following 16 metabolites were excluded because they were measured in <80% of participants: anserine, 6-phosphogluconate, adenine, anthranilic acid, butyrobetaine, C14:0 CE, C20 carnitine, C54:9 TAG, cholate, glutathione oxidized, glycine, homocysteine, orotate, phosphoenolpyruvate, propionate, and taurodeoxycholate

Table S2. Attenuation of correlation between SAVE scores and top 37 metabolites after further adjustments in addition to age and study site, organized by taxonomy classification

| Metabolites, organized by HMDB taxonomy super and sub class | Correlation with SAVE, adjusted for age & site (N=287) | A) Adjusting for smoking status (N=287) |               | B) Adjusting for body mass index (N=287) |               | C) Adjusting for % fat and appendicular lean mass (n=275 <sup>a</sup> ) |               | D) Adjusting for daily protein intake (n=283 <sup>a</sup> ) |               | E) Adjusting for IL-6 and CRP (n=275 <sup>a</sup> ) |               |
|-------------------------------------------------------------|--------------------------------------------------------|-----------------------------------------|---------------|------------------------------------------|---------------|-------------------------------------------------------------------------|---------------|-------------------------------------------------------------|---------------|-----------------------------------------------------|---------------|
|                                                             |                                                        | Correlation                             | % attenuation | Correlation                              | % attenuation | Correlation                                                             | % attenuation | Correlation                                                 | % attenuation | Correlation                                         | % attenuation |
| <b>Organic acids and derivatives:</b>                       |                                                        |                                         |               |                                          |               |                                                                         |               |                                                             |               |                                                     |               |
| <i>Amino acids/peptides/analogues:</i>                      |                                                        |                                         |               |                                          |               |                                                                         |               |                                                             |               |                                                     |               |
| Methionine                                                  | -0.19, p=.001                                          | -0.19, p=.001                           | 0.17%         | -0.19, p=.001                            | -2.1%         | -0.18, p=.004                                                           | 5.6%          | -0.17, p=.004                                               | 4.5%          | -0.18, p=.004                                       | 4.1%          |
| Tyrosine                                                    | -0.17, p=.004                                          | -0.17, p=.004                           | 0.18%         | -0.18, p=.002                            | -6.9%         | -0.17, p=.005                                                           | -8.2%         | -0.16, p=.009                                               | 3.6%          | -0.18, p=.002                                       | -1.2%         |
| Creatinine                                                  | 0.16, p=.008                                           | 0.16, p=.007                            | -2.1%         | 0.16, p=.009                             | 0.29%         | 0.15, p=.01                                                             | -6.8%         | 0.17, p=.004                                                | -1.4%         | 0.15, p=.01                                         | 5.0%          |
| Cystathionine                                               | 0.15, p=.009                                           | 0.15, p=.009                            | 0.26%         | 0.15, p=.009                             | 0.26%         | 0.16, p=.009                                                            | 0.36%         | 0.16, p=.008                                                | 5.2%          | 0.14, p=.02                                         | 1.4%          |
| Asparagine                                                  | -0.15, p=.01                                           | -0.15, p=.01                            | 0.30%         | -0.15, p=.01                             | 0.25%         | -0.15, p=.02                                                            | 5.9%          | -0.15, p=.02                                                | 0.57%         | -0.13, p=.03                                        | 4.5%          |
| Leucine                                                     | -0.14, p=.02                                           | -0.14, p=.02                            | 0.33%         | -0.16, p=.009                            | -8.6%         | -0.14, p=.02                                                            | 0.95%         | -0.14, p=.02                                                | 0.71%         | -0.15, p=.01                                        | -1.6%         |
| 5-aminolevulinic acid                                       | 0.14, p=.02                                            | 0.14, p=.02                             | -1.9%         | 0.14, p=.02                              | 0.36%         | 0.13, p=.04                                                             | 7.7%          | 0.15, p=.01                                                 | 0.82%         | 0.11, p=.06                                         | 4.9%          |
| Histidine                                                   | -0.13, p=.03                                           | -0.13, p=.03                            | 0.27%         | -0.13, p=.02                             | -1.1%         | -0.13, p=.03                                                            | 7.5%          | -0.12, p=.048                                               | 4.4%          | -0.11, p=.07                                        | 7.5%          |
| Symmetric dimethylarginine (SDMA)                           | 0.13, p=.03                                            | 0.13, p=.02                             | -1.6%         | 0.13, p=.02                              | -1.5%         | 0.12, p=.05                                                             | 3.9%          | 0.15, p=.01                                                 | -1.3%         | 0.12, p=.04                                         | 3.1%          |
| <i>Beta hydroxy acids/derivatives:</i>                      |                                                        |                                         |               |                                          |               |                                                                         |               |                                                             |               |                                                     |               |
| C4-OH carnitine                                             | 0.16, p=.009                                           | 0.15, p=.009                            | 0.13%         | 0.16, p=.009                             | 0.02%         | 0.15, p=.01                                                             | 2.1%          | 0.17, p=.006                                                | 2.8%          | 0.15, p=.01                                         | -5.1%         |
| Malate                                                      | 0.12, p=.04                                            | 0.12, p=.045                            | 0.36%         | 0.12, p=.04                              | -2.4%         | 0.12, p=.048                                                            | 2.3%          | 0.13, p=.03                                                 | 3.2%          | 0.14, p=.02                                         | -7.0%         |
| <i>Ureas:</i>                                               |                                                        |                                         |               |                                          |               |                                                                         |               |                                                             |               |                                                     |               |
| N-carbamoyl-beta-alanine                                    | 0.17, p=.004                                           | 0.17, p=.004                            | 0.05%         | 0.17, p=.004                             | -0.16%        | 0.18, p=.002                                                            | 2.7%          | 0.19, p=.001                                                | 2.4%          | 0.15, p=.01                                         | 1.5%          |
| <i>Tricarboxylic acids/derivatives:</i>                     |                                                        |                                         |               |                                          |               |                                                                         |               |                                                             |               |                                                     |               |
| Isocitrate                                                  | 0.17, p=.004                                           | 0.17, p=.004                            | 0.06%         | 0.17, p=.004                             | 0.21%         | 0.16, p=.007                                                            | 6.1%          | 0.17, p=.004                                                | 7.4%          | 0.17, p=.004                                        | -3.4%         |
| <i>Dicarboxylic acids/derivatives:</i>                      |                                                        |                                         |               |                                          |               |                                                                         |               |                                                             |               |                                                     |               |
| Fumarate                                                    | 0.13, p=.03                                            | 0.13, p=.03                             | 0.33%         | 0.13, p=.03                              | -0.84%        | 0.15, p=.01                                                             | 2.9%          | 0.14, p=.02                                                 | 5.3%          | 0.14, p=.02                                         | -8.7%         |
| <i>Short-chain hydroxy acids/derivatives:</i>               |                                                        |                                         |               |                                          |               |                                                                         |               |                                                             |               |                                                     |               |
| 2-hydroxyglutarate                                          | 0.13, p=.03                                            | 0.13, p=.03                             | -0.59%        | 0.13, p=.03                              | -0.03%        | 0.12, p=.05                                                             | 11%           | 0.13, p=.03                                                 | 0.15%         | 0.13, p=.03                                         | -0.19%        |
| <b>Lipids and lipid-like molecules:</b>                     |                                                        |                                         |               |                                          |               |                                                                         |               |                                                             |               |                                                     |               |
| <i>Phosphosphingolipids:</i>                                |                                                        |                                         |               |                                          |               |                                                                         |               |                                                             |               |                                                     |               |
| C14:0 SM                                                    | -0.15, p=.009                                          | -0.15, p=.009                           | 0.23%         | -0.16, p=.007                            | -3.3%         | -0.16, p=.007                                                           | -7.3%         | -0.15, p=.01                                                | -2.9%         | -0.15, p=.01                                        | -1.5%         |
| C24:0 SM                                                    | -0.13, p=.03                                           | -0.13, p=.03                            | 0.42%         | -0.13, p=.03                             | -1.4%         | -0.14, p=.02                                                            | -4.9%         | -0.13, p=.03                                                | 0.03%         | -0.10, p=.09                                        | 4.2%          |
| C22:0 SM                                                    | -0.13, p=.03                                           | -0.12, p=.04                            | 0.44%         | -0.13, p=.03                             | -2.5%         | -0.15, p=.01                                                            | -8.9%         | -0.14, p=.02                                                | -2.7%         | -0.11, p=.07                                        | -0.15%        |
| <i>Glycerophosphoethanolamines:</i>                         |                                                        |                                         |               |                                          |               |                                                                         |               |                                                             |               |                                                     |               |
| C34:3 PE plasmalogen                                        | -0.13, p=.03                                           | -0.13, p=.03                            | -0.05%        | -0.13, p=.03                             | -0.69%        | -0.14, p=.02                                                            | -4.0%         | -0.12, p=.04                                                | -2.4%         | -0.09, p=.16                                        | 4.2%          |
| C36:4 PE                                                    | 0.13, p=.03                                            | 0.13, p=.03                             | 0.22%         | 0.13, p=.03                              | -0.26%        | 0.12, p=.04                                                             | -10%          | 0.13, p=.03                                                 | -1.9%         | 0.13, p=.03                                         | -2.4%         |
| C44:13 PE plasmalogen                                       | -0.12, p=.049                                          | -0.12, p=.05                            | 0.50%         | -0.12, p=.05                             | 0.39%         | -0.10, p=.09                                                            | 4.8%          | -0.11, p=.06                                                | -2.2%         | -0.09, p=.15                                        | 8.6%          |
| <i>Ceramides:</i>                                           |                                                        |                                         |               |                                          |               |                                                                         |               |                                                             |               |                                                     |               |
| C24:1 ceramide (d18:1)                                      | 0.13, p=.03                                            | 0.13, p=.03                             | 0.009%        | 0.13, p=.03                              | -0.74%        | 0.13, p=.03                                                             | 0.07%         | 0.13, p=.02                                                 | -0.29%        | 0.13, p=.04                                         | 1.2%          |
| <i>Glycerophosphocholines:</i>                              |                                                        |                                         |               |                                          |               |                                                                         |               |                                                             |               |                                                     |               |
| C20:5 LPC                                                   | -0.12, p=.04                                           | -0.12, p=.04                            | 0.23%         | -0.13, p=.04                             | -0.19%        | -0.12, p=.06                                                            | 5.8%          | -0.12, p=.04                                                | -2.1%         | -0.09, p=.14                                        | 11%           |
| <i>Bile acids, alcohols/derivatives:</i>                    |                                                        |                                         |               |                                          |               |                                                                         |               |                                                             |               |                                                     |               |
| Glycodeoxycholate                                           | -0.12, p=.04                                           | -0.12, p=.04                            | -0.49%        | -0.12, p=.04                             | 0.50%         | -0.13, p=.04                                                            | -4.9%         | -0.13, p=.03                                                | -6.9%         | -0.11, p=.07                                        | -2.3%         |
| <i>Triradylglycerols:</i>                                   |                                                        |                                         |               |                                          |               |                                                                         |               |                                                             |               |                                                     |               |
| C54:10 TAG                                                  | -0.12, p=.046                                          | -0.12, p=.047                           | 0.47%         | -0.12, p=.04                             | -3.2%         | -0.15, p=.01                                                            | -5.1%         | -0.12, p=.049                                               | -0.60%        | -0.11, p=.07                                        | 2.3%          |
| <i>Steroid esters:</i>                                      |                                                        |                                         |               |                                          |               |                                                                         |               |                                                             |               |                                                     |               |
| C18:2 CE                                                    | -0.13, p=.03                                           | -0.13, p=.03                            | -0.14%        | -0.13, p=.03                             | -0.91%        | -0.13, p=.03                                                            | -0.33%        | -0.13, p=.03                                                | -2.2%         | -0.10, p=.11                                        | 4.8%          |
| <b>Organoheterocyclic compounds:</b>                        |                                                        |                                         |               |                                          |               |                                                                         |               |                                                             |               |                                                     |               |
| <i>Indolyl carboxylic acids/derivatives:</i>                |                                                        |                                         |               |                                          |               |                                                                         |               |                                                             |               |                                                     |               |
| Tryptophan                                                  | -0.21, p=.0005                                         | -0.20, p=.0005                          | 0.14%         | -0.21, p=.0004                           | -2.3%         | -0.19, p=.002                                                           | 5.1%          | -0.20, p=.0007                                              | -2.2%         | -0.23, p=.0001                                      | 0.66%         |
| <i>Pyridinecarboxylic acids/derivatives:</i>                |                                                        |                                         |               |                                          |               |                                                                         |               |                                                             |               |                                                     |               |
| 1-methylnicotinamide                                        | -0.15, p=.01                                           | -0.15, p=.01                            | 0.29%         | -0.15, p=.01                             | 0.18%         | -0.16, p=.007                                                           | -3.8%         | -0.16, p=.006                                               | -5.3%         | -0.13, p=.03                                        | 4.7%          |
| <i>Purines and purine derivatives:</i>                      |                                                        |                                         |               |                                          |               |                                                                         |               |                                                             |               |                                                     |               |
| Urate                                                       | 0.13, p=.03                                            | 0.13, p=.03                             | 0.04%         | 0.13, p=.03                              | -0.75%        | 0.14, p=.02                                                             | -2.8%         | 0.13, p=.03                                                 | 3.2%          | 0.12, p=.047                                        | -1.1%         |
| <i>Tryptamines and derivatives:</i>                         |                                                        |                                         |               |                                          |               |                                                                         |               |                                                             |               |                                                     |               |
| 5-hydroxytryptophan                                         | -0.12, p=.04                                           | -0.12, p=.04                            | -2.0%         | -0.12, p=.04                             | -0.27%        | -0.11, p=.07                                                            | 11%           | -0.12, p=.04                                                | 2.2%          | -0.13, p=.04                                        | -0.59%        |
| <b>Benzenoids:</b>                                          |                                                        |                                         |               |                                          |               |                                                                         |               |                                                             |               |                                                     |               |
| <i>1-hydroxy-2-unsubstituted benzenoids:</i>                |                                                        |                                         |               |                                          |               |                                                                         |               |                                                             |               |                                                     |               |
| Hydroxyphenylacetate                                        | 0.15, p=.01                                            | 0.15, p=.01                             | 0.29%         | 0.15, p=.01                              | 0.32%         | 0.13, p=.03                                                             | 7.1%          | 0.14, p=.02                                                 | -4.5%         | 0.16, p=.01                                         | 3.0%          |
| <i>Benzoic acids and derivatives:</i>                       |                                                        |                                         |               |                                          |               |                                                                         |               |                                                             |               |                                                     |               |
| Salicylurate                                                | 0.12, p=.04                                            | 0.12, p=.04                             | 0.25%         | 0.12, p=.04                              | 0.10%         | 0.11, p=.08                                                             | 11%           | 0.10, p=.09                                                 | 4.9%          | 0.13, p=.03                                         | 4.3%          |

| Metabolites, organized by HMDB taxonomy super and sub class                                      | Correlation with SAVE, adjusted for age & site (N=287) | A) Adjusting for smoking status (N=287) |               | B) Adjusting for body mass index (N=287) |               | C) Adjusting for % fat and appendicular lean mass (n=275 <sup>a</sup> ) |               | D) Adjusting for daily protein intake (n=283 <sup>a</sup> ) |               | E) Adjusting for IL-6 and CRP (n=275 <sup>a</sup> ) |               |
|--------------------------------------------------------------------------------------------------|--------------------------------------------------------|-----------------------------------------|---------------|------------------------------------------|---------------|-------------------------------------------------------------------------|---------------|-------------------------------------------------------------|---------------|-----------------------------------------------------|---------------|
|                                                                                                  |                                                        | Correlation                             | % attenuation | Correlation                              | % attenuation | Correlation                                                             | % attenuation | Correlation                                                 | % attenuation | Correlation                                         | % attenuation |
| <i>Phenylacetic acids:</i><br>Homogentisate                                                      | 0.12, p=.04                                            | 0.12, p=.04                             | -0.04%        | 0.12, p=.04                              | 0.32%         | 0.14, p=.03                                                             | -8.6%         | 0.11, p=.06                                                 | 9.2%          | 0.15, p=.01                                         | 3.2%          |
| <b>Organic nitrogen compounds:</b>                                                               |                                                        |                                         |               |                                          |               |                                                                         |               |                                                             |               |                                                     |               |
| <i>Amines:</i><br>Putrescine                                                                     | 0.15, p=.01                                            | 0.16, p=.008                            | -4.7%         | 0.15, p=.01                              | 0.03%         | 0.15, p=.01                                                             | -1.7%         | 0.13, p=.03                                                 | 7.9%          | 0.14, p=.02                                         | -0.10%        |
| <i>Aminoxides:</i><br>Trimethylamine-N-oxide                                                     | 0.13, p=.03                                            | 0.13, p=.03                             | 0.28%         | 0.13, p=.03                              | 0.35%         | 0.10, p=.11                                                             | 9.5%          | 0.14, p=.02                                                 | -11%          | 0.14, p=.02                                         | 0.03%         |
| <b>Nucleosides/nucleotides/analogues:</b><br><i>Sub class not available:</i><br>Inosine          | 0.14, p=.02                                            | 0.14, p=.02                             | 0.24%         | 0.14, p=.02                              | 0.03%         | 0.14, p=.02                                                             | 1.8%          | 0.13, p=.03                                                 | 7.2%          | 0.13, p=.03                                         | 3.6%          |
| <b>Organic oxygen compounds:</b><br><i>Carbohydrates/carbohydrate conjugates:</i><br>Glucuronate | 0.21, p=.0003                                          | 0.21, p=.0003                           | -0.08%        | 0.21, p=.0003                            | 0.01%         | 0.20, p=.001                                                            | 5.2%          | 0.22, p=.0002                                               | 3.9%          | 0.21, p=.0006                                       | 0.61%         |

Columns of Table S2 continued.

| Log-transformed and standardized Metabolites  | Age/site-adjusted correlation with SAVE (N=287) | F) Adjusting for creatinine (n=284 <sup>a</sup> ) |               | G) Adjusting for prevalent diseases <sup>b</sup> (N=287) |               | H) Adjusting for medications <sup>c</sup> (N=287) |               | I) Adjusting for multiple variables <sup>d</sup> (n=257 <sup>a</sup> ) |               |
|-----------------------------------------------|-------------------------------------------------|---------------------------------------------------|---------------|----------------------------------------------------------|---------------|---------------------------------------------------|---------------|------------------------------------------------------------------------|---------------|
|                                               |                                                 | Correlation                                       | % attenuation | Correlation                                              | % attenuation | Correlation                                       | % attenuation | Correlation                                                            | % attenuation |
| <b>Organic acids and derivatives:</b>         |                                                 |                                                   |               |                                                          |               |                                                   |               |                                                                        |               |
| <i>Amino acids/peptides/analogues:</i>        |                                                 |                                                   |               |                                                          |               |                                                   |               |                                                                        |               |
| Methionine                                    | -0.19, p=.001                                   | -0.17, p=.004                                     | -0.61%        | -0.17, p=.005                                            | 11%           | -0.16, p=.006                                     | 13%           | -0.13, p=.04                                                           | 16%           |
| Tyrosine                                      | -0.17, p=.004                                   | -0.15, p=.01                                      | 9.0%          | -0.18, p=.003                                            | -4.5%         | -0.20, p=.0009                                    | -14%          | -0.16, p=.01                                                           | -5.1%         |
| Creatinine                                    | 0.16, p=.008                                    | 0.04, p=.48                                       | 74%           | 0.13, p=.03                                              | 16%           | 0.11, p=.07                                       | 30%           | 0.02, p=.79                                                            | 89%           |
| Cystathionine                                 | 0.15, p=.009                                    | 0.14, p=.02                                       | 25%           | 0.18, p=.003                                             | -15%          | 0.15, p=.01                                       | 1.8%          | 0.11, p=.09                                                            | 32%           |
| Asparagine                                    | -0.15, p=.01                                    | -0.15, p=.01                                      | -2.5%         | -0.13, p=.03                                             | 11%           | -0.12, p=.046                                     | 21%           | -0.12, p=.07                                                           | 13%           |
| Leucine                                       | -0.14, p=.02                                    | -0.13, p=.03                                      | 3.7%          | -0.19, p=.002                                            | -29%          | -0.20, p=.0007                                    | -41%          | -0.19, p=.003                                                          | -34%          |
| 5-aminolevulinic acid                         | 0.14, p=.02                                     | 0.04, p=.47                                       | 69%           | 0.11, p=.06                                              | 20%           | 0.10, p=.11                                       | 32%           | -0.02, p=.81                                                           | 113%          |
| Histidine                                     | -0.13, p=.03                                    | -0.14, p=.02                                      | -3.9%         | -0.12, p=.05                                             | 12%           | -0.14, p=.02                                      | -2.3%         | -0.12, p=.07                                                           | 4.3%          |
| Symmetric dimethylarginine (SDMA)             | 0.13, p=.03                                     | 0.02, p=.71                                       | 83%           | 0.12, p=.04                                              | 5.2%          | 0.11, p=.07                                       | 18%           | 0.02, p=.77                                                            | 86%           |
| <i>Beta hydroxy acids/derivatives:</i>        |                                                 |                                                   |               |                                                          |               |                                                   |               |                                                                        |               |
| C4-OH carnitine                               | 0.16, p=.009                                    | 0.12, p=.04                                       | 15%           | 0.12, p=.04                                              | 23%           | 0.13, p=.04                                       | 21%           | 0.10, p=.14                                                            | 35%           |
| Malate                                        | 0.12, p=.04                                     | 0.10, p=.08                                       | 14%           | 0.12, p=.045                                             | 0.09%         | 0.16, p=.007                                      | -35%          | 0.16, p=.01                                                            | -8.8%         |
| <i>Ureas:</i>                                 |                                                 |                                                   |               |                                                          |               |                                                   |               |                                                                        |               |
| N-carbamoyl-beta-alanine                      | 0.17, p=.004                                    | 0.14, p=.02                                       | 26%           | 0.14, p=.02                                              | 20%           | 0.13, p=.03                                       | 26%           | 0.13, p=.045                                                           | 39%           |
| <i>Tricarboxylic acids/derivatives:</i>       |                                                 |                                                   |               |                                                          |               |                                                   |               |                                                                        |               |
| Isocitrate                                    | 0.17, p=.004                                    | 0.13, p=.03                                       | 30%           | 0.16, p=.009                                             | 8.5%          | 0.15, p=.01                                       | 11%           | 0.11, p=.08                                                            | 40%           |
| <i>Dicarboxylic acids/derivatives:</i>        |                                                 |                                                   |               |                                                          |               |                                                   |               |                                                                        |               |
| Fumarate                                      | 0.13, p=.03                                     | 0.12, p=.05                                       | 12%           | 0.13, p=.03                                              | -3.1%         | 0.14, p=.02                                       | -11%          | 0.19, p=.002                                                           | -6.6%         |
| <i>Short-chain hydroxy acids/derivatives:</i> |                                                 |                                                   |               |                                                          |               |                                                   |               |                                                                        |               |
| 2-hydroxyglutarate                            | 0.13, p=.03                                     | 0.06, p=.28                                       | 47%           | 0.11, p=.07                                              | 15%           | 0.12, p=.04                                       | 4.2%          | 0.07, p=.29                                                            | 49%           |
| <b>Lipids and lipid-like molecules:</b>       |                                                 |                                                   |               |                                                          |               |                                                   |               |                                                                        |               |
| <i>Phosphosphingolipids:</i>                  |                                                 |                                                   |               |                                                          |               |                                                   |               |                                                                        |               |
| C14:0 SM                                      | -0.15, p=.009                                   | -0.15, p=.01                                      | -0.32%        | -0.16, p=.009                                            | -0.73%        | -0.16, p=.009                                     | -0.62%        | -0.14, p=.03                                                           | -6.2%         |
| C24:0 SM                                      | -0.13, p=.03                                    | -0.14, p=.02                                      | -7.3%         | -0.12, p=.04                                             | 2.4%          | -0.13, p=.03                                      | 0.86%         | -0.13, p=.049                                                          | -2.5%         |
| C22:0 SM                                      | -0.13, p=.03                                    | -0.14, p=.02                                      | -6.4%         | -0.12, p=.04                                             | 2.4%          | -0.13, p=.04                                      | 0.37%         | -0.15, p=.02                                                           | -10%          |
| <i>Glycerophosphoethanolamines:</i>           |                                                 |                                                   |               |                                                          |               |                                                   |               |                                                                        |               |
| C34:3 PE plasmalogen                          | -0.13, p=.03                                    | -0.14, p=.02                                      | -6.3%         | -0.13, p=.03                                             | 0.86%         | -0.18, p=.003                                     | -35%          | -0.08, p=.21                                                           | -15%          |
| C36:4 PE                                      | 0.13, p=.03                                     | 0.11, p=.06                                       | 17%           | 0.10, p=.10                                              | 24%           | 0.11, p=.07                                       | 16%           | 0.07, p=.31                                                            | 43%           |
| C44:13 PE plasmalogen                         | -0.12, p=.049                                   | -0.13, p=.03                                      | -4.4%         | -0.10, p=.10                                             | 16%           | -0.12, p=.04                                      | -5.3%         | -0.07, p=.29                                                           | 23%           |
| <i>Ceramides:</i>                             |                                                 |                                                   |               |                                                          |               |                                                   |               |                                                                        |               |
| C24:1 ceramide (d18:1)                        | 0.13, p=.03                                     | 0.11, p=.07                                       | 4.1%          | 0.13, p=.03                                              | 1.3%          | 0.14, p=.02                                       | -5.4%         | 0.12, p=.06                                                            | -6.9%         |
| <i>Glycerophosphocholines:</i>                |                                                 |                                                   |               |                                                          |               |                                                   |               |                                                                        |               |
| C20:5 LPC                                     | -0.12, p=.04                                    | -0.13, p=.03                                      | 0.69%         | -0.10, p=.11                                             | 23%           | -0.11, p=.07                                      | 13%           | -0.06, p=.36                                                           | 40%           |
| <i>Bile acids, alcohols/derivatives:</i>      |                                                 |                                                   |               |                                                          |               |                                                   |               |                                                                        |               |
| Glycodeoxycholate                             | -0.12, p=.04                                    | -0.12, p=.04                                      | 0.72%         | -0.11, p=.06                                             | 7.3%          | -0.11, p=.06                                      | 8.2%          | -0.13, p=.045                                                          | -13%          |



| Log-transformed and standardized Metabolites                                                       | Age/site-adjusted correlation with SAVE (N=287) | F) Adjusting for creatinine (n=284 <sup>a</sup> ) |               | G) Adjusting for prevalent diseases <sup>b</sup> (N=287) |               | H) Adjusting for medications <sup>c</sup> (N=287) |               | I) Adjusting for multiple variables <sup>d</sup> (n=257 <sup>a</sup> ) |               |
|----------------------------------------------------------------------------------------------------|-------------------------------------------------|---------------------------------------------------|---------------|----------------------------------------------------------|---------------|---------------------------------------------------|---------------|------------------------------------------------------------------------|---------------|
|                                                                                                    |                                                 | Correlation                                       | % attenuation | Correlation                                              | % attenuation | Correlation                                       | % attenuation | Correlation                                                            | % attenuation |
| <i>Triradylglycerols:</i><br>C54:10 TAG                                                            | -0.12, p=.046                                   | -0.12, p=.05                                      | -5.7%         | -0.13, p=.02                                             | -14%          | -0.13, p=.02                                      | -13%          | -0.16, p=.01                                                           | -23%          |
| <i>Steroid esters:</i><br>C18:2 CE                                                                 | -0.13, p=.03                                    | -0.15, p=.01                                      | -4.6%         | -0.11, p=.07                                             | 17%           | -0.12, p=.04                                      | 6.5%          | -0.09, p=.17                                                           | 22%           |
| <b>Organoheterocyclic compounds:</b><br><i>Indolyl carboxylic acids/derivatives:</i><br>Tryptophan | -0.21, p=.0005                                  | -0.17, p=.004                                     | 16%           | -0.20, p=.0007                                           | 1.8%          | -0.19, p=.001                                     | 6.8%          | -0.18, p=.005                                                          | 15%           |
| <i>Pyridinecarboxylic acids/derivatives:</i><br>1-methylnicotinamide                               | -0.15, p=.01                                    | -0.17, p=.004                                     | -12%          | -0.16, p=.009                                            | -3.4%         | -0.17, p=.004                                     | -13%          | -0.18, p=.004                                                          | -25%          |
| <i>Purines and purine derivatives:</i><br>Urate                                                    | 0.13, p=.03                                     | 0.09, p=.13                                       | 32%           | 0.13, p=.03                                              | -1.4%         | 0.12, p=.05                                       | 10%           | 0.11, p=.09                                                            | 21%           |
| <i>Tryptamines and derivatives:</i><br>5-hydroxytryptophan                                         | -0.12, p=.04                                    | -0.07, p=.24                                      | 41%           | -0.12, p=.047                                            | 0.52%         | -0.09, p=.11                                      | 21%           | -0.10, p=.13                                                           | 31%           |
| <b>Benzenoids:</b><br><i>1-hydroxy-2-unsubstituted benzenoids:</i><br>Hydroxyphenylacetate         | 0.15, p=.01                                     | 0.08, p=.16                                       | 41%           | 0.10, p=.08                                              | 32%           | 0.08, p=.16                                       | 45%           | -0.004, p=.95                                                          | 103%          |
| <i>Benzoic acids and derivatives:</i><br>Salicylurate                                              | 0.12, p=.04                                     | 0.08, p=.21                                       | 36%           | 0.05, p=.40                                              | 59%           | 0.04, p=.51                                       | 68%           | -0.02, p=.75                                                           | 118%          |
| <i>Phenylacetic acids:</i><br>Homogentisate                                                        | 0.12, p=.04                                     | 0.08, p=.16                                       | 22%           | 0.08, p=.16                                              | 32%           | 0.09, p=.12                                       | 24%           | 0.08, p=.19                                                            | 45%           |
| <b>Organic nitrogen compounds:</b><br><i>Amines:</i><br>Putrescine                                 | 0.15, p=.01                                     | 0.11, p=.06                                       | 19%           | 0.15, p=.009                                             | -2.6%         | 0.14, p=.02                                       | 6.5%          | 0.11, p=.09                                                            | 16%           |
| <i>Aminoxides:</i><br>Trimethylamine-N-oxide                                                       | 0.13, p=.03                                     | 0.07, p=.25                                       | 47%           | 0.10, p=.10                                              | 24%           | 0.07, p=.27                                       | 49%           | 0.02, p=.73                                                            | 80%           |
| <b>Nucleosides/nucleotides/analogues:</b><br><i>Sub class not available:</i><br>Inosine            | 0.14, p=.02                                     | 0.12, p=.046                                      | 11%           | 0.13, p=.03                                              | 3.3%          | 0.15, p=.01                                       | -11%          | 0.12, p=.06                                                            | 16%           |
| <b>Organic oxygen compounds:</b><br><i>Carbohydrates/carbohydrate conjugates:</i><br>Glucuronate   | 0.21, p=.0003                                   | 0.17, p=.004                                      | 25%           | 0.18, p=.002                                             | 15%           | 0.15, p=.01                                       | 30%           | 0.12, p=.07                                                            | 49%           |

Percent attenuation=100\*(r<sub>1</sub>-r<sub>2</sub>)/r<sub>1</sub>; where r<sub>1</sub>=correlation coefficient between SAVE scores and a metabolite adjusting for age and study site, r<sub>2</sub>=correlation coefficient after further adjustments

<sup>a</sup>For the more commonly measured variables that were not measured in all 287 participants: the correlation coefficient that was further adjusted for that variable was compared to the age- and site-adjusted correlation coefficient restricted to the same sample size to calculate percent attenuation.

<sup>b</sup>Prevalent diseases: cardiovascular diseases, hypertension, diabetes, cancer, peripheral arterial disease, osteoarthritis, depression, and pulmonary diseases

<sup>c</sup>Medications: anti-hypertensives, antilipemics, medications for diabetes, and medications for pulmonary diseases

<sup>d</sup>Current smoking status, body mass index, appendicular lean mass, % fat, daily protein intake, interleukin-6, C-reactive protein, creatinine, cardiovascular disease, cancer, peripheral arterial disease, osteoarthritis, depression, number of prescription medications, anti-hypertensives, antilipemics, medications for diabetes, medications for pulmonary diseases

Shading: blue indicates negative attenuation≤-10% (stronger association after adjustment) and red indicates positive attenuation≥10% (weaker association after adjustment)

Table S3. Metabolites detected among overnight-fasting plasma samples from 287 Health ABC black men by the three profiling platforms

| Method                                                | Metabolites (M=334)                                                                                                                                                                                                                                                                                                                                                                                                                                                                                                                                                                                                                                                                                                                                                                                                                                                                                                                                                                                                                                                                                                                                                                                                                                                                                                                                                                                                                                                                                                                                                                                                                                                                                                                                                                                                                                                                                                                                                                                                                                                                                                                                                                                                                                                                                                                                                                                                                                                       |
|-------------------------------------------------------|---------------------------------------------------------------------------------------------------------------------------------------------------------------------------------------------------------------------------------------------------------------------------------------------------------------------------------------------------------------------------------------------------------------------------------------------------------------------------------------------------------------------------------------------------------------------------------------------------------------------------------------------------------------------------------------------------------------------------------------------------------------------------------------------------------------------------------------------------------------------------------------------------------------------------------------------------------------------------------------------------------------------------------------------------------------------------------------------------------------------------------------------------------------------------------------------------------------------------------------------------------------------------------------------------------------------------------------------------------------------------------------------------------------------------------------------------------------------------------------------------------------------------------------------------------------------------------------------------------------------------------------------------------------------------------------------------------------------------------------------------------------------------------------------------------------------------------------------------------------------------------------------------------------------------------------------------------------------------------------------------------------------------------------------------------------------------------------------------------------------------------------------------------------------------------------------------------------------------------------------------------------------------------------------------------------------------------------------------------------------------------------------------------------------------------------------------------------------------|
| Lipid profiling method (C8-positive; m=187)           | <p>C14:0 LPC, C16:0 LPC, C16:1 LPC, C18:0 LPC, C18:1 LPC, C18:2 LPC, C20:3 LPC, C20:4 LPC, C20:5 LPC, C22:6 LPC, C30:0 PC, C30:1 PC, C32:0 PC, C32:1 PC, C32:2 PC, C34:0 PC, C34:1 PC, C34:1 PC plasmalogen-A, C34:2 PC, C34:2 PC plasmalogen, C34:3 PC, C34:3 PC plasmalogen, C34:4 PC, C36:0 PC, C36:1 PC, C36:1 PC plasmalogen, C36:2 PC, C36:2 PC plasmalogen, C36:3 PC, C36:3 PC plasmalogen, C36:4 PC plasmalogen, C36:4 PC-A, C36:4 PC-B, C36:5 PC plasmalogen-A, C36:5 PC plasmalogen-B, C38:2 PC, C38:3 PC, C38:4 PC, C38:4 PC plasmalogen, C38:6 PC, C38:6 PC plasmalogen, C38:7 PC plasmalogen, C40:10 PC, C40:6 PC, C40:7 PC plasmalogen, C40:9 PC, C16:0 LPE, C18:0 LPE, C18:1 LPE, C18:2 LPE, C20:4 LPE, C22:6 LPE, C34:0 PE, C34:2 PE, C34:2 PE plasmalogen, C34:3 PE plasmalogen, C36:0 PE, C36:1 PE, C36:2 PE, C36:2 PE plasmalogen, C36:3 PE, C36:3 PE plasmalogen, C36:4 PE, C36:4 PE plasmalogen, C36:5 PE plasmalogen, C38:2 PE, C38:3 PE plasmalogen, C38:4 PE, C38:5 PE, C38:5 PE plasmalogen, C38:6 PE, C38:6 PE plasmalogen, C38:7 PE plasmalogen, C40:6 PE, C40:7 PE plasmalogen, C42:11 PE plasmalogen, C44:13 PE plasmalogen, C32:1 PI, C32:2 PI, C34:0 PI, C34:2 PI, C38:4 PI, C34:0 PS, C42:0 TAG, C44:0 TAG, C44:1 TAG, C44:2 TAG, C46:0 TAG, C46:1 TAG, C46:2 TAG, C46:3 TAG, C46:4 TAG, C48:0 TAG, C48:1 TAG, C48:2 TAG, C48:3 TAG, C48:4 TAG, C48:5 TAG, C50:0 TAG, C50:1 TAG, C50:2 TAG, C50:3 TAG, C50:4 TAG, C50:5 TAG, C50:6 TAG, C52:0 TAG, C52:1 TAG, C52:2 TAG, C52:3 TAG, C52:4 TAG, C52:5 TAG, C52:6 TAG, C52:7 TAG, C54:1 TAG, C54:10 TAG, C54:2 TAG, C54:3 TAG, C54:4 TAG, C54:5 TAG, C54:6 TAG, C54:7 TAG, C54:8 TAG, C56:1 TAG, C56:10 TAG, C56:2 TAG, C56:3 TAG, C56:4 TAG, C56:5 TAG, C56:6 TAG, C56:7 TAG, C56:8 TAG, C56:9 TAG, C58:10 TAG, C58:11 TAG, C58:6 TAG, C58:7 TAG, C58:8 TAG, C58:9 TAG, C30:0 DAG, C32:0 DAG, C32:1 DAG, C32:2 DAG, C34:0 DAG, C34:1 DAG, C36:0 DAG, C36:1 DAG, C36:2 DAG, C38:4 DAG, C38:5 DAG, C14:1 MAG, C16:1 MAG, C18:0 MAG, C22:1 MAG, C34:2 DAG, C34:3 DAG, C36:3 DAG, C36:4 DAG, C14:0 SM, C16:0 SM, C18:0 SM, C18:1 SM, C20:0 SM, C22:0 SM, C22:1 SM, C24:0 SM, C24:1 SM, C16:1 SM, C18:2 SM, C16:0 ceramide (d18:1), C22:0 ceramide (d18:1), C24:0 ceramide (d18:1), C24:1 ceramide (d18:1), C16:0 CE, C16:1 CE, C18:0 CE, C18:1 CE, C18:2 CE, C18:3 CE, C20:3 CE, C20:4 CE, C20:5 CE, C22:4 CE, C22:5 CE, C22:6 CE, C36:1 PS plasmalogen, C36:2 PS plasmalogen, sphingosine</p> |
| Positive ion mode MS detection (HILIC-positive; m=87) | <p>Alpha-glycerophosphocholine, C5:1 carnitine, C5 carnitine, C10 carnitine, C12 carnitine, C14 carnitine, C14:1 carnitine, C16 carnitine, C18 carnitine, C18:1 carnitine, C18:2 carnitine, C2 carnitine, C26 carnitine, C3 carnitine, C4 carnitine, C6 carnitine, C8 carnitine, mevalonic acid, 5-aminolevulinic acid, acetylglycine, Asymmetric dimethylarginine (ADMA), alanine, aminoisobutyric acid, arginine, asparagine, beta-alanine, betaine, citrulline, creatine, creatinine, dimethylglycine, Gamma-Aminobutyric acid (GABA), glutamate, glutamine, histidine, hydroxyproline, isoleucine, leucine, lysine, methionine, methionine sulfoxide, N-Monomethyl-arginine (NMMA), ornithine, phenylalanine, pipecolic acid, proline, pyroglutamic acid, sarcosine, Symmetric dimethylarginine (SDMA), serine, threonine, thyroxine, tyrosine, valine, C4-OH carnitine, C12:1 carnitine, C16-OH carnitine, C18:1-OH carnitine, C3-DC-CH3 carnitine, C5-DC carnitine, C7 carnitine, C9 carnitine, taurine, phosphoethanolamine, N-carbamoyl-beta-alanine, 5-hydroxytryptophan, 1-methylnicotinamide, allantoin, cytosine, tryptophan, serotonin, niacinamide, cotinine, kynurenic acid, adenosine, xanthosine, acetylcholine, 1-methylhistamine, histamine, putrescine, trimethylamine-N-oxide, carnitine, choline, 3-hydroxyanthranilic acid, C10:2 carnitine, C14:2 carnitine, C20:4 carnitine</p>                                                                                                                                                                                                                                                                                                                                                                                                                                                                                                                                                                                                                                                                                                                                                                                                                                                                                                                                                                                                                                                                  |
| Negative ion mode MS detection (HILIC-negative; m=60) | <p>Alpha-glycerophosphate, adipate, Guanosine monophosphate (GMP), 3-methyladipate/pimelate, chenodeoxycholate/deoxycholate, glycocholate, glycodeoxycholate/glycochenodeoxycholate, 2-aminoadipate, cystathionine, phosphocreatine, beta-hydroxybutyrate, malate, alpha-hydroxybutyrate, lactate, 2-hydroxyglutarate, fumarate/maleate, methylmalonate, oxalate, succinate, aconitate, citrate, isocitrate, pyruvate, alpha-ketoglutarate, indoxylsulfate, uracil, hypoxanthine, urate, xanthine, indole-3-propionate, quinolinate, 4-pyridoxate, xanthurenate, 2-phosphoglycerate, inositol, pantothenate, fructose/glucose/galactose, glucuronate, hexose monophosphate, lactose, sorbitol, sucrose, kynurenine, Malondialdehyde (MDA), inosine, cAMP, Adenosine diphosphate (ADP), Adenosine monophosphate (AMP), Guanosine diphosphate (GDP), Inosinic acid (IMP), uridine, Uridine diphosphate (UDP)-glucose, uridine 5'-diphosphate (UDP), 4-hydroxymandelate, benzoate, gentisate, hippurate, salicylurate, homogentisate, hydroxyphenylacetate,</p>                                                                                                                                                                                                                                                                                                                                                                                                                                                                                                                                                                                                                                                                                                                                                                                                                                                                                                                                                                                                                                                                                                                                                                                                                                                                                                                                                                                                              |

Table S4. Taxonomy classification based on the Human Metabolome Database of 334 metabolites detected in overnight-fasting plasma from 287 Health ABC black men

| HMDB Taxonomy super class                      | HMDB Taxonomy class                        | HMDB Taxonomy sub class                         |
|------------------------------------------------|--------------------------------------------|-------------------------------------------------|
| Lipids and lipid-like molecules (m=211)        | Glycerophospholipids (m=85)                | Glycerophosphocholines (m=47)                   |
|                                                |                                            | Glycerophosphoethanolamines (m=31)              |
|                                                |                                            | Glycerophosphoinositols (m=5)                   |
|                                                |                                            | Glycerophosphoserines (m=1)                     |
|                                                |                                            | Glycerophosphates (m=1)                         |
|                                                | Glycerolipids (m=70)                       | Triradylglycerols (m=55)                        |
|                                                |                                            | Diradylglycerols (m=11)                         |
|                                                |                                            | Monoradylglycerols (m=4)                        |
|                                                | Fatty acyls (m=24)                         | Fatty acid esters (m=16)                        |
|                                                |                                            | Lineolic acids and derivatives (m=4)            |
|                                                |                                            | Fatty acids and conjugates (m=3)                |
|                                                |                                            | Eicosanoids (m=1)                               |
|                                                | Sphingolipids (m=15)                       | Phosphosphingolipids (m=9)                      |
|                                                |                                            | Ceramides (m=4)                                 |
| Not available (m=2)                            |                                            |                                                 |
| Steroids and steroid derivatives (m=15)        | Steroid esters (m=12)                      |                                                 |
|                                                | Bile acids, alcohols and derivatives       |                                                 |
| Not available (m=2)                            | Not available (m=2)                        |                                                 |
| Organic acids and derivatives (m=65)           | Carboxylic acids and derivatives (m=46)    | Amino acids, peptides, and analogues (m=39)     |
|                                                |                                            | Dicarboxylic acids and derivatives (m=4)        |
|                                                |                                            | Tricarboxylic acids and derivatives (m=3)       |
|                                                | Hydroxy acids and derivatives (m=13)       | Beta hydroxy acids and derivatives (m=10)       |
|                                                |                                            | Alpha hydroxy acids and derivatives (m=2)       |
|                                                |                                            | Short-chain hydroxy acids and derivatives (m=1) |
|                                                | Keto acids and derivatives (m=2)           | Alpha-keto acids and derivatives (m=1)          |
|                                                |                                            | Gamma-keto acids and derivatives (m=1)          |
| Organic sulfuric acids and derivatives (m=2)   | Arylsulfates (m=1)                         |                                                 |
|                                                | Organosulfonic acids and derivatives (m=1) |                                                 |
| Organic phosphoric acids and derivatives (m=1) | Phosphate esters (m=1)                     |                                                 |
| Organic carbonic acids and derivatives (m=1)   | Ureas (m=1)                                |                                                 |
| Organoheterocyclic compounds (m=17)            | Pyridines and derivatives (m=5)            | Pyridinecarboxylic acids and derivatives (m=4)  |
|                                                |                                            | Pyrrolidinylpyridines (m=1)                     |
|                                                | Imidazopyrimidines (m=3)                   | Purines and purine derivatives (m=3)            |
|                                                | Indoles and derivatives (m=2)              | Indolyl carboxylic acids and derivatives        |
|                                                | Diazines (m=2)                             | Pyrimidines and pyrimidine derivatives          |
|                                                | Quinolines and derivatives (m=2)           | Quinoline carboxylic acids                      |
|                                                | Indoles and derivatives (m=2)              | Tryptamines and derivatives                     |
| Azoles (m=1)                                   | Imidazoles (m=1)                           |                                                 |
| Organic oxygen compounds (m=11)                | Organooxygen compounds (m=11)              | Carbohydrates and carbohydrate conjugates (m=6) |
|                                                |                                            | Alcohols and polyols (m=2)                      |
|                                                |                                            | Carbonyl compounds (m=2)                        |
|                                                |                                            | Carbohydrates and carbohydrate conjugates (m=1) |
| Nucleosides, nucleotides, and analogues (m=11) | Purine nucleosides (m=7)                   | Purine ribonucleotides (m=4)                    |
|                                                |                                            | Cyclic purine nucleotides (m=1)                 |
|                                                |                                            | Not available (m=2)                             |
|                                                | Pyrimidine nucleosides (m=4)               | Pyrimidine nucleotide sugars (m=2)              |
|                                                |                                            | Pyrimidine ribonucleotides (m=1)                |
| Not available (m=1)                            | Not available (m=1)                        |                                                 |
| Organic nitrogen compounds (m=8)               | Organonitrogen compounds (m=8)             | Amines (m=4)                                    |
|                                                |                                            | Quaternary ammonium salts (m=3)                 |
|                                                |                                            | Aminoxides (m=1)                                |
| Benzenoids (m=8)                               | Benzene and substituted derivatives (m=5)  | Benzoic acids and derivatives (m=4)             |
|                                                |                                            | Phenylacetic acids (m=1)                        |
|                                                | Benzene and substituted derivatives (m=1)  | Benzoic acids and derivatives (m=1)             |
| Phenols (m=2)                                  | 1-hydroxy-2-unsubstituted benzenoids (m=2) |                                                 |
| Not available (m=3)                            | Not available (m=3)                        | Not available (m=3)                             |

HMDB=Human Metabolome Database (Reference: Wishart, D.S. et al. HMDB: the human metabolome database. Nucleic acids research. 2007, 35(suppl\_1), D521-D526.)
